RESEARCH ARTICLE

# Potentials, barriers, and strategies for integrating tuberculosis, diabetes mellitus, and hypertension case management: A scoping review

Ari Probandari<sup>1,2</sup>\*, Kyra Modesty<sup>1</sup>, Vivienne Tjung<sup>1</sup>, Brigitta Elycia Sitepu<sup>1</sup>, Febby Gunawan Siswanto<sup>1</sup>, Kerub Dion<sup>1</sup>, Victoria Sari<sup>1,2</sup>, Ailiana Santosa<sup>3</sup>, Nawi Ng<sup>3</sup>, Vitri Widyaningsih<sup>1,2</sup>

**1** Disease Control Research Group, Faculty of Medicine, Universitas Sebelas Maret, Surakarta, Indonesia, **2** Department of Public Health and Preventive Medicine, Faculty of Medicine, Universitas Sebelas Maret, Surakarta, Indonesia, **3** School of Public Health and Community Medicine, Institute of Medicine, Sahlgrenska Academy, University of Gothenburg, Gothenburg, Sweden

\* These authors are contributed equally to this work.

\* [ari.probandari@staff.uns.ac.id](mailto:ari.probandari@staff.uns.ac.id)

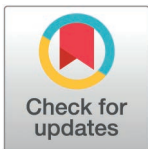

**OPEN ACCESS**

**Citation:** Probandari A, Modesty K, Tjung V, Sitepu BE, Siswanto FG, Dion K, et al. (2026) Potentials, barriers, and strategies for integrating tuberculosis, diabetes mellitus, and hypertension case management: A scoping review. PLoS One 21(6): e0345708. <https://doi.org/10.1371/journal.pone.0345708>

**Editor:** Immaculate Sabelile Tenza, North-West University, SOUTH AFRICA

**Received:** September 17, 2025

**Accepted:** June 3, 2026

**Published:** June 26, 2026

**Copyright:** © 2026 Probandari et al. This is an open access article distributed under the terms of the [Creative Commons Attribution License](https://creativecommons.org/licenses/by/4.0/), which permits unrestricted use, distribution, and reproduction in any medium, provided the original author and source are credited.

**Data availability statement:** All relevant data are within the manuscript and its [Supporting Information](#) files.

**Funding:** This work was supported by Lembaga Penelitian dan Pengabdian Kepada Masyarakat Universitas Sebelas Maret with research grant

## Abstract

### Background

The coexistence of tuberculosis (TB) with other chronic diseases, such as diabetes mellitus (DM) and hypertension, presents a growing challenge for efforts to end TB due to the complex interactions of coordinated care among relevant care providers and increased risk of adverse outcomes. The comorbidities between TB and DM underscore the necessity of integrated care approaches that span screening, diagnosis, and treatment. Although integrated care models have the potential to improve patient outcomes by supporting people to complete treatment, improving retention in care, and streamlining service delivery, the understanding of low integration within existing health systems is also limited. This scoping review aims to map existing models of integrated TB, DM, and hypertension case management, identify potential benefits and examine barriers to integration, and define strategies for effective implementation.

### Methods

This scoping review examined original research papers on the integrated management of TB, DM, and hypertension, published from January 2005 to January 2025. Studies of various designs were included and sourced from databases such as MEDLINE, Scopus, ScienceDirect, and EMERALD using targeted search terms. Four reviewers independently screened and extracted data using a standardized form. Findings were synthesized qualitatively and discussed with experts for additional insights.

Number 371/UN27.22/PT.01.03/2025. The funders had no role in study design, data collection and analysis, decision to publish, or preparation of the manuscript.

**Competing interests:** No authors have competing interests.

## Discussion

From 7,983 studies screened, 126 studies met the inclusion criteria. The findings reveal that integrated management of TB, DM, and hypertension can improve access to care, program retention, and early detection of comorbidities. Integration of services—including screening, diagnosis, treatment, counseling, and support for patients' self-management—was generally well-received, practical to implement, and contributed to improved patient outcomes. Nevertheless, several barriers remain, such as fragmented health systems, lack of standardized protocols, inadequate provider training, limited health information systems, and insufficient financing mechanisms. Addressing these challenges requires systemic interventions, including strengthened policy and regulatory frameworks, capacity-building through structured training, robust and interoperable information systems, inter-program coordination, task-shifting strategies, and patient-centered care approaches. While the evidence highlights the potential of integrated care, gaps remain in demonstrating long-term outcomes and cost-effectiveness, underscoring the need for further research and evaluation to support the scale-up of successful models across diverse health system contexts.

## Introduction

The health burden in low- and middle-income countries (LMICs) has shifted from infectious diseases to non-communicable diseases (NCDs). The World Health Organization (WHO) estimated that two-thirds of hypertension cases [1] and 3 in 4 adults with diabetes would be found in LMICs in 2025 [2]. The coexistence of both conditions is particularly concerning because high blood sugar levels can damage blood vessels and increase blood pressure, while hypertension can further complicate diabetes management and increase the risk of cardiovascular complications [3]. Despite the escalating burden of NCDs, the prevalence of epidemics remains high. Tuberculosis (TB) continues to exist in LMICs, contributing to their high mortality rates [4,5]. The combination of TB and NCDs offers a different level of challenges. TB patients with DM tend to present with higher bacillary loads compared to their non-diabetic counterparts [6].

On the other hand, health systems in developing countries often operate in silos. Lack of data quality and equity results in inadequate data-driven decision-making, which causes longer health service delivery and poor health outcomes [7]. On top of that, governance, the health system, and financial support are also crucial to achieve greater integrative health management [8]. Despite the individuality of health systems in developing countries, the dual burdens of infectious and NCDs in LMICs underscore the need for integrated disease management by involving screening, diagnosis, treatment, and care for all three health conditions [9]. There is still limited review on the potential and barriers in the integration of TB, DM, and hypertension management, particularly in LMICs. This review aimed to map the concepts of integrated

disease management and health service integration while also identifying the potential, barriers, and key strategies associated with the integrated management of TB, DM, and hypertension.

## Materials and methods

We conducted a scoping review following the framework outlined by Arksey and O'Malley enhanced by Leval et al. [10], which consists of five steps: (1) identifying the research question, (2) identifying relevant studies, (3) study selection, (4) charting the data, and (5) collating, summarizing, and reporting results, and conducting consultation. Details of population, concept, and context are described in the previous publication [11]. The review was reported in accordance with the Preferred Reporting Items for Systematic Reviews and Meta-Analyses Extension for Scoping Reviews (PRISMA-ScR), and the completed PRISMA-ScR checklist is provided as Supporting Information (S1 File).

This scoping review is part of the Integrated Model for Tuberculosis, Diabetes, and Hypertension Screening Among Workers (INSIGHT) Project, which has obtained ethical clearance No. 09/UN27.06.6.1/KEP/EC/2021. The scoping review is not subject to obtaining informed consent, as it does not involve the collection or use of data from human participants.

### Identification of research questions

We searched for all original research papers relevant to TB, DM, and hypertension management. We searched literature using Medical Literature Analysis and Retrieval System Online (MEDLINE), Scopus, ScienceDirect, and EMERALD, as well as a Google search for grey literature. Keywords used in this study included 'tuberculosis', 'diabetes mellitus', 'hypertension', 'integration', 'diagnosis', 'treatment', and 'screening'. The Boolean Logic (AND and OR) and keywords for searching literature relevant to the integration of TB, DM, and hypertension management used in this review article followed the previous protocols published [11]. On the other hand, the OR operator is applied to broaden the scope of a condition, returning results that meet at least one of the specified criteria from "tuberculosis" OR "TB".

### Selection of studies

We selected studies published from January 2005 to January 2025 in English. Four reviewers (KM, FGS, BES, and KD) independently screened the titles and abstracts of the studies and conducted a full-text review of selected studies, independently extracting relevant data. However, despite any disagreements, AP and VW checked all the results of screening by these reviewers. Disagreements among reviewers were discussed and resolved by other researchers (AP and VW). The selected studies were synthesized qualitatively by grouping them into several themes, including the concept of integration and its level of implementation within health systems. The results were discussed with the other authors (AP, VW, AS, and NN) during a consultation. We particularly adhered to the Joanna Briggs Institute (JBI) protocol for scoping reviews [12].

The flow of studies from initial identification to final inclusion is presented in Fig 1. The primary search of this review, conducted across PubMed, Scopus, and ScienceDirect, yielded 7983 studies, which were checked for duplicates by title. After removing duplicates (n = 508), 7475 studies remained and were screened by title and abstract. Of these, 7290 articles were excluded, leaving 185 articles for full-text screening. During full-text screening, 57 articles were excluded, 40 due to clinical outcomes and 19 for lack of integration in-between these diseases. Ultimately, 126 articles were deemed eligible for data extraction in this scoping review (Fig 1).

### Charting the data

Studies included in this review were classified based on the type of disease management (screening, treatment, others), barriers and facilitators related to the six WHO health system building blocks (policy and governance, financing, human resources, medicines and medical technologies, health systems delivery, and health information), and level of implementation in health care systems (community, primary, and referral care) [13]. Positive outcomes in the studies included are

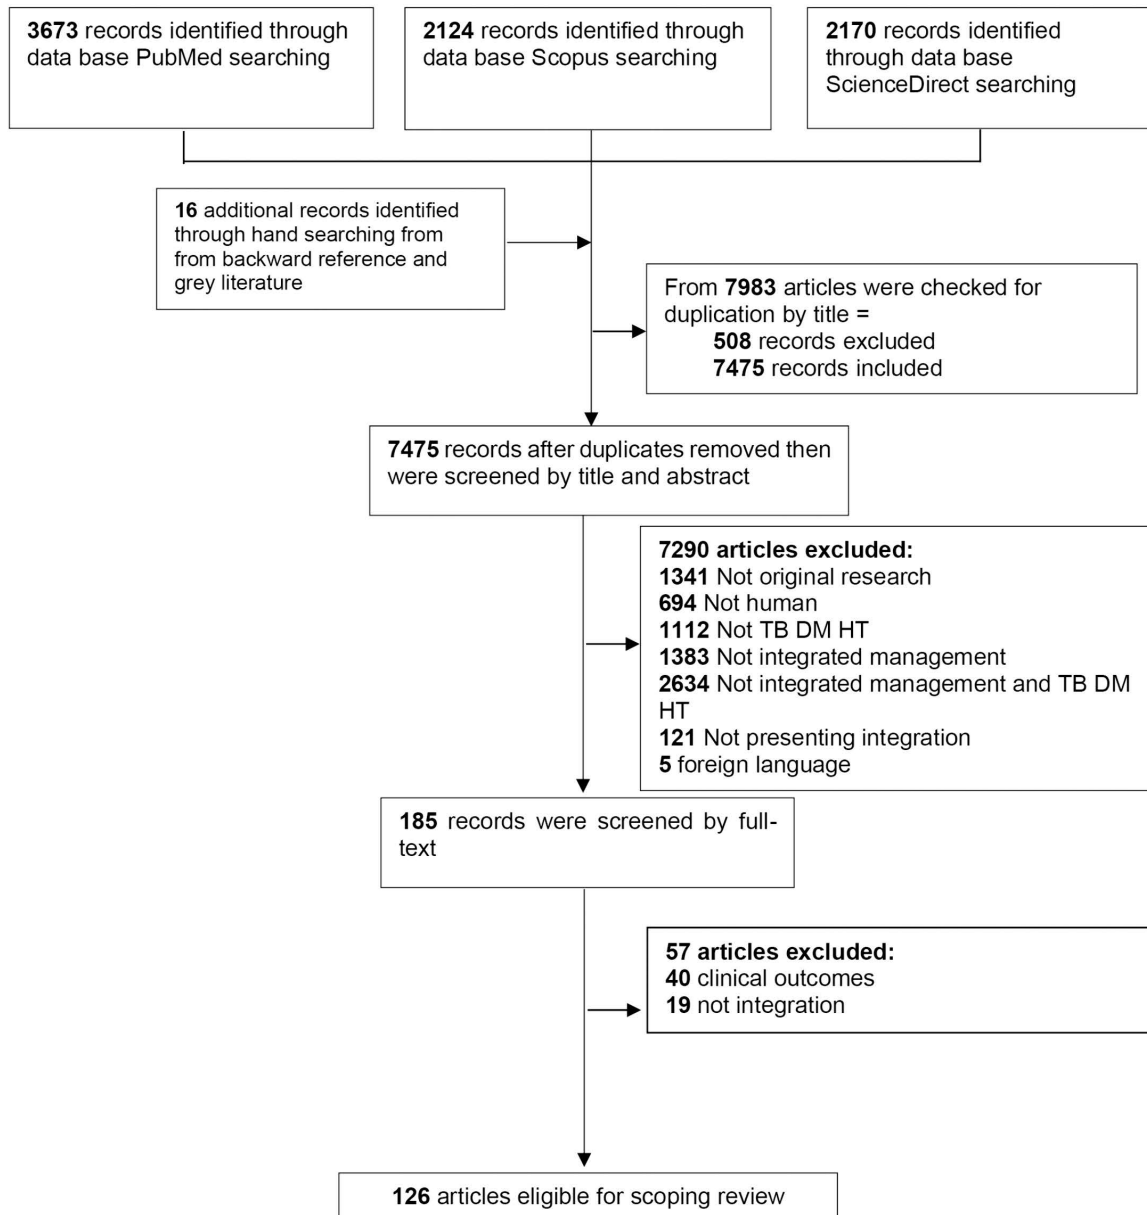

**Fig 1. Flowchart of selection studies.**

<https://doi.org/10.1371/journal.pone.0345708.g001>

relevant to the integration and are defined as potentials. While any factors hinder the integration is defined as barriers (negative outcomes). Any efforts to tackle the challenges are included as strategies.

## Results

### Description of studies

Regarding the level of implementation, integration among TB, DM, and hypertension was notably conducted at primary care (n=61, 46%), followed by community level (n=49, 37%), then referral care (n=24, 18%), with seven studies

reporting multilevel integration [14–20]. Most studies (n=48, 38%) originated from low- to middle-income countries. The remaining studies were relatively evenly distributed across high-income (n=27, 21%), low and middle-income (n=26, 20%), and upper-middle-income countries (n=22, 17%). The concept of integration consisted of health promotion (n=6, 7%), screening (n=61, 56%), diagnosis (n=11, 10%), and treatment (n=32, 29%). The list of all included papers was provided in the [S1 Table](#).

Only nine studies (7%) cover the integration of three diseases (TB, DM, and hypertension) (Fig 2). Most studies reveal the integrated management of two diseases (TB and DM, TB and hypertension, or DM and hypertension). The integrated management also exists with other chronic diseases such as HIV, renal diseases, and mental health. Among the nine studies of integrated management of TB, DM, and hypertension [21–29], five studies showed the integration at the community level [24–28], focusing on screening, and one study was conducted at the primary healthcare level (n=1, 12.5%) [29], and three studies were conducted at the referral healthcare level (n=3, 37.5%) focus on integrating NCDs in TB care [21–23].

The integration between two disease control programs/health services occurred mainly between DM-hypertension (n=89, 71%), while the integration between infectious and non-communicable disease management (i.e., TB-DM and TB-hypertension) is less common (n=28, 22%). The integration between DM-hypertension is mainly done at the primary health care level (n=61, 46%), focusing on screening and treatment. Meanwhile, there are 36 studies on community-based and fifteen studies at the referral level. For TB-DM integration, there are ten studies in the community, eighteen studies in primary health care, and nine studies at the referral level for TB-DM integration.

The literature comprised of observational studies (cross-sectional/cohort; n=40) and qualitative studies (n=30) as the largest groups, followed by RCT/experimental studies (n=23), prevention program evaluations (n=14), mixed-methods studies (n=11), and other designs (n=8). Across the 126 included studies, 123 studies (97.6%) reported at least one potential (positive outcomes). Conversely, 21/126 studies (16.7%) did not report any barriers (negative outcomes), and 3/126 studies (2.4%) did not report any potentials. This suggests that positive outcomes were almost universally captured across the literature, whereas a meaningful minority of studies focused on outcomes without documenting negative effects. By study design, studies without any barriers (n=21; 16.7% of all studies) occurred most often in observational designs (6/40; 15.0%), followed by prevention program evaluations (5/14; 35.7%) and RCT/experimental studies (4/23; 17.4%). Smaller numbers were observed in qualitative studies (3/30; 10.0%) and other designs (3/8; 37.5%). In terms of the presence of barriers, this corresponds to 34/40 observational (85.0%), 27/30 qualitative (90.0%), 19/23 RCT/experimental (82.6%), 9/14 prevention program evaluations (64.3%), and 5/8 other designs (62.5%) reporting at least one barrier. For positive outcomes, only three studies overall did not report any potentials (3/126; 2.4%), comprising 2 observational studies and 1 qualitative study. Accordingly, 38/40 observational studies (95.0%) and 29/30 qualitative studies

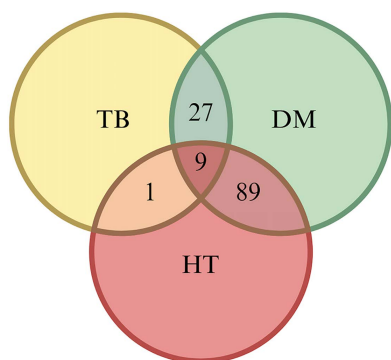

**Fig 2. Number of selected studies based on the type of diseases in the integrated case management.**

<https://doi.org/10.1371/journal.pone.0345708.g002>

(96.7%) reported at least one potential. This implies that all RCT/experimental (23/23), prevention program evaluations (14/14), mixed-methods studies (11/11), and other designs (8/8) reported at least one potential.

The literature analyzed the settings of integration, consisting of urban (n=49; 38.8%), rural (n=38; 30.2%), and mixed urban and rural settings (n=39; 31%). Therefore, in total, there are 34 studies conducted in rural settings and 33 studies conducted in urban settings that reported barriers. Among these studies, 34 studies in rural areas reported barriers, which mainly include limited availability of diagnostic tools and digital resources, restricted access to specialized care, and less structured health systems. Meanwhile, 33 studies in urban areas reported barriers, primarily related to high patient volumes, despite having better resources and more organized healthcare systems that support integration efforts [30–34]. In contrast, rural settings are frequently constrained by limited healthcare infrastructure, workforce shortages, and geographic inaccessibility, although they benefit from stronger community engagement and participation. Studies conducted in urban-rural settings generally reflect a combination of these characteristics, balancing broader service coverage with persistent disparities in resource availability and service delivery [35–41].

A total of 16 studies explored the economic evaluation of strategies involving shared infrastructure, task-shifting, and human resource optimization [15,25,33,41–51]. Among these, all studies incorporated elements of human resource optimization (n=16, 100%), reflecting a consistent focus on improving workforce efficiency and service delivery. Within this group, task-shifting and service integration, such as group medical visits, redistribution of clinical responsibilities, and integrated management of multiple conditions, were described in nine studies (n=9, 56%). These approaches demonstrated substantial efficiency gains, including reported cost savings for integrated visits and group-based care models. Meanwhile, shared infrastructure or integrated service platforms (combining HIV, TB, hypertension, and diabetes services within single systems) were identified in seven studies (n=7, 44%), often associated with reduced per-patient costs and improved cost-effectiveness outcomes.

Specifically, twelve studies (n=12, 75%) demonstrated that the interventions were cost-effective based on established willingness-to-pay thresholds [25,45–48,50–52]. Additionally, three studies (n=3, 19%) explicitly reported reductions in catastrophic or direct household costs, including one study showing a 20% reduction in tuberculosis-related household expenses through cash transfers and another highlighting that only 5% of patients experienced catastrophic costs under integrated care approaches. Furthermore, two studies (n=2, 13%) addressed loss to follow-up or continuity-related economic benefits indirectly through improved adherence mechanisms such as multi-month dispensing and peer-support [15,25,49] models. Overall, these findings indicate that while human resource optimization, particularly task-shifting, dominates the evidence base, shared infrastructure and integrated care models consistently contribute to improved economic efficiency, reduced patient financial burden, and better continuity of care.

## Potentials

Integrated management of TB, DM, and hypertension has demonstrated several potential benefits, including enhanced access to care, improved continuity and retention in care, early detection and management of diseases and comorbidities, and improved cost-effectiveness.

**Improved case detection and access to care.** Numerous studies have demonstrated that integrated disease management can enhance access to healthcare, particularly through expanded screening coverage that enables earlier diagnosis and timely treatment [22,52–57]. However, evidence suggests variations in effectiveness based on resource availability. In low-resource settings and rural areas, integration serves as a critical entry point for patients who otherwise lack specialized NCD care, yet its success is frequently constrained by external structural barriers [38,58]. For instance, while integrated screening improves detection in rural Ethiopia and Tanzania, the continuity of care is often broken by external factors such as the transportation costs, high out-of-pocket costs, and recurring medication stock-outs that integration alone cannot resolve [15,33,38,58,59]. Conversely, urban and higher-income settings, such as those in Central Vietnam or Indonesia, demonstrate more effective follow-up and disease control because the foundational infrastructure

(stable supply chains and digital health information systems) is already in place to support the newly integrated protocols [36,61]. Early detection facilitates more effective disease management. Improved follow-up care has been identified as a key component of the care continuum, supporting treatment adherence, monitoring progress, and enabling timely adjustments, all of which contribute to improved health outcomes [60–65].

Access to healthcare has also seen notable improvements. Greater accessibility enables more patients to receive appropriate and timely medical attention, which is especially important for managing both acute and chronic conditions [22,24,52–57,66,67]. The increase in diagnosed patients reflects the success of these integrated efforts. With more individuals identified, healthcare systems are better positioned to allocate resources efficiently and implement targeted interventions [24,56,64].

Moreover, the integration of technology into screening and disease management programs has further enhanced their effectiveness. Digital tools improve data collection, streamline clinical processes, and support patient engagement, all of which are essential components of modern healthcare delivery [18,56,62,68–72]. Evidence suggests that these digital interventions currently achieve higher impact in urban centers and middle-income countries due to superior telecommunications infrastructure and higher digital literacy among both providers and patients [56,64,73]. In these settings, high digital penetration allows for seamless EMR systems and patient-generated health data (PGHD) to bridge the gap between home and clinic [56,64,70,73]. Conversely, in rural and low-income countries, the digital approaches remained a significant barrier, while technology offers the theoretical potential to bypass geographic isolation, its effectiveness is often stifled by frequent power outages, inconsistent internet connectivity, and a lack of technical support for frontline health workers [69,72–74]. Integrated disease management improves healthcare access through expanded screening coverage, improved follow-up mechanisms, and more strategic resource allocation [18,56,62,69,71,72,74]. However, to sustain and amplify these benefits, it is essential to invest in supporting infrastructure, including capacity building and robust health information systems, particularly for the integrated management of multimorbidity.

**Early detection and management of diseases and comorbidities.** Early management of diseases and comorbidities has shown promising results in improving the detection and management of patients with TB, DM, and hypertension [21,22,31,52–57,74–76]. With early management, healthcare providers can offer appropriate treatments and support, prevent further deterioration, and improve health outcomes [21,52,54,56,77–80]. Early referral also ensures patients receive the right care at the right time, benefiting both them and their families by managing symptoms better and improving quality of life [24,56,64,78–80]. Data from the analyzed studies indicate that these systems work most effectively in urban and higher-income settings. In these areas, referral facilities are better prepared with specialized staff and functional diagnostic tests, such as HbA1c and creatinine testing. In these urban centers, early detection leads to immediate clinical action [43,75]. In contrast, in low-income rural settings (such as parts of Ethiopia and Cambodia) early management often meets barriers due to equipment inertia and the lack of secondary-level laboratory readiness [37,38,40,59]. Consequently, although urban health systems often face challenges related to high patient volumes and fragmented continuity of care in managing two or three diseases in one site despite improved screening, rural health systems frequently struggle to translate early diagnosis into effective treatment, as essential referral services remain physically distant and financially inaccessible for many patients [29,35–40,58,59].

The integration of healthcare services introduces a comprehensive and patient-centered approach to managing DM and TB treatment synergistically [14,32,52] and providing more personalized care [52]. Although research on the integration of TB, DM, and hypertension is still limited, existing evidence suggests that integrated care can lead to better health outcomes and improved quality of life for patients [14,32,52,61]. There is no study showing that integration can reduce the adverse effects of multimorbidity.

**Improve the efficiency of health services.** Some studies revealed that the integration of TB and DM management is cost-effective to reduce financial strain on healthcare systems and to improve patient compliance with treatment [9,15,44,45,47]. The integration of TB and DM services also has the potential to optimize medication regimens

and minimize unnecessary clinic visits, which can enhance the efficiency of care delivery [19,44,81–83]. This approach not only alleviates the workload of health staff [19,30,84–86]. Tu et al. (2020) explain that early detection and effective management of NCDs reduce their impact on individuals and communities, promoting healthier lives and lowering healthcare costs [89].

**Improve continuity of care and retention in the program.** Enhancing continuity of care and patient retention within healthcare programs is essential for achieving long-term health outcomes [36,58,74,87–89]. A growing body of literature underscores the effectiveness of structured follow-up protocols in maintaining patient engagement and adherence to treatment plans [36,56,58,62,74,83,90]. The use of digital technologies, such as automated reminders and telehealth services, has been shown to reduce missed appointments and improve the overall consistency of care delivery [56,62,76,80,91–94]. Personalized follow-up strategies further contribute to these outcomes [49,60,77,83,90]. Tailoring follow-up care to individual patient needs—such as by considering cultural factors, health literacy, and patient preferences—has been associated with increased adherence rates and better clinical results [49,60,77,83,90]. Central to these efforts is the use of comprehensive data tracking and integrated healthcare systems, which allow for seamless communication among multidisciplinary care teams and support informed decision-making [18,56,62,74,95–97].

Effective communication between healthcare providers and patients, along with active involvement of patients' support systems, is another cornerstone of integrated care. Empowering patients through education and support enhances their capacity for self-management, which in turn contributes to improved functional outcomes and overall well-being [58,60,77,83,90,98,99]. Tu et al. (2020) highlights the importance of patient motivation, education, and consistent provider support in fostering adherence to both medication and healthy lifestyle behaviors [89]. Retention in healthcare programs also hinges on relational and systemic factors. Personalized communication strategies and consistent, proactive follow-up are essential for sustaining patient engagement over time [58,60,77,83,90]. Additionally, the integration of medical records ensures that all healthcare professionals involved in a patient's care have access to a complete and up-to-date health history, thus facilitating better coordination and continuity [18,56,95–97,100].

Patient-provider interactions also play a pivotal role in influencing perceptions of care quality. Studies by Mohr et al. (2019) and Benzer et al. (2019) suggest that positive interpersonal experiences within the healthcare system can significantly enhance patient satisfaction and trust, further supporting retention and adherence [91,92]. Finally, addressing systemic barriers, such as the financial cost of preventive screenings, is crucial for promoting equitable access to care [15,25,49,53,58,101]. Basir et al. (2019) and Rosenberg et al. (2020) emphasize that reducing these barriers and fostering a culture of proactive health management can improve participation in preventive health measures, ultimately leading to better public health outcomes [25,53].

**Improve cost effectiveness.** The findings of this review indicate that integrated care models are generally economically favorable across diverse settings [25,42,43,45–48,50,51]. Most included studies demonstrated cost-effectiveness, with incremental cost-effectiveness ratios (ICERs) ranging from less than \$50 per disability-adjusted life year (DALY) averted to approximately \$23,700 per quality-adjusted life year (QALY), suggesting that these interventions fall within commonly accepted willingness-to-pay thresholds [45–48,50,51]. These results highlight the potential of integration strategies to deliver meaningful health gains while maintaining efficient resource use [25,42,43,45,46,48,50,51].

A key driver of these economic benefits is the ability of integrated models to leverage existing resources, particularly through shared infrastructure, task-shifting and human resource optimization, including reduced catastrophic costs and loss to follow-up [25,42–44,48,50,51,85,86]. In the South African and Eswatini studies, the clinics, supply chains, and staff were already funded for HIV care [42,43]. Adding hypertension or DM screening allowed the system to achieve economies of scope, where the total cost of providing two services together is lower than the cost of providing them separately [42,43,50,51]. By utilizing the same physical space and administrative staff, health systems in Eswatini reduced the cost of a chronic care visit from \$10.85 to \$6.53, a nearly 40% reduction in service delivery costs [42].

Integrated models frequently rely on task-shifting, where lower-level healthcare workers take on routine monitoring tasks [30,84–86]. As seen in one study in Kenya, using group medical visits allows one clinician to see 10–15 patients at once rather than 10–15 separate appointments [48,73]. This drastically reduces the personnel cost per patient, which typically accounts for 50–60% of a clinic’s budget [43]. Although the time allocated per patient may be reduced, the depth and meaningfulness of patient engagement often improve through shared experiences and peer support, ultimately enhancing the overall efficiency of care delivery relative to the resources invested in personnel [25,48,73].

A key systemic benefit highlighted in the Manitoba and China studies is the substantial cost-saving achieved through the prevention of catastrophic complications [46,47]. From a health system perspective, the cost of a point-of-care (POC), such as glucose or blood pressure test is negligible (often under \$2.00) compared to the catastrophic cost of treating a stroke, heart attack, or end-stage renal failure [42,46]. In remote Indigenous communities, for example, the system saves millions of dollars in medical evacuation and dialysis costs for every patient whose kidney disease is managed early through integrated screening [46,70,102]. This shifts the financial burden from expensive hospital care to affordable primary care.

In fragmented systems, patients often drop-out of the care pathway when they are referred from one clinic to another (e.g., from a TB clinic to a separate DM center) [36,58,64,103,104]. This missed opportunity of diagnosis and treatment is a high burden for the health system [58,64,103,104]. Integrated models, like the mobile units in Peru, achieved linkage rates as high as 93% for TB and 81% for hypertension [26]. By closing the gap between screening and treatment in a single visit, the system ensures that the initial investment in diagnosis results in a treated patient, maximizing the return on diagnostic investment [24,26,45,51].

**Barriers and key strategies.** We describe barriers and key strategies based on the six building blocks of Health Systems by WHO. Details of barriers and key strategies are presented in [S2 Table](#). Summary of the barriers and key strategies of the three diseases integration are provided in [Fig 3](#).

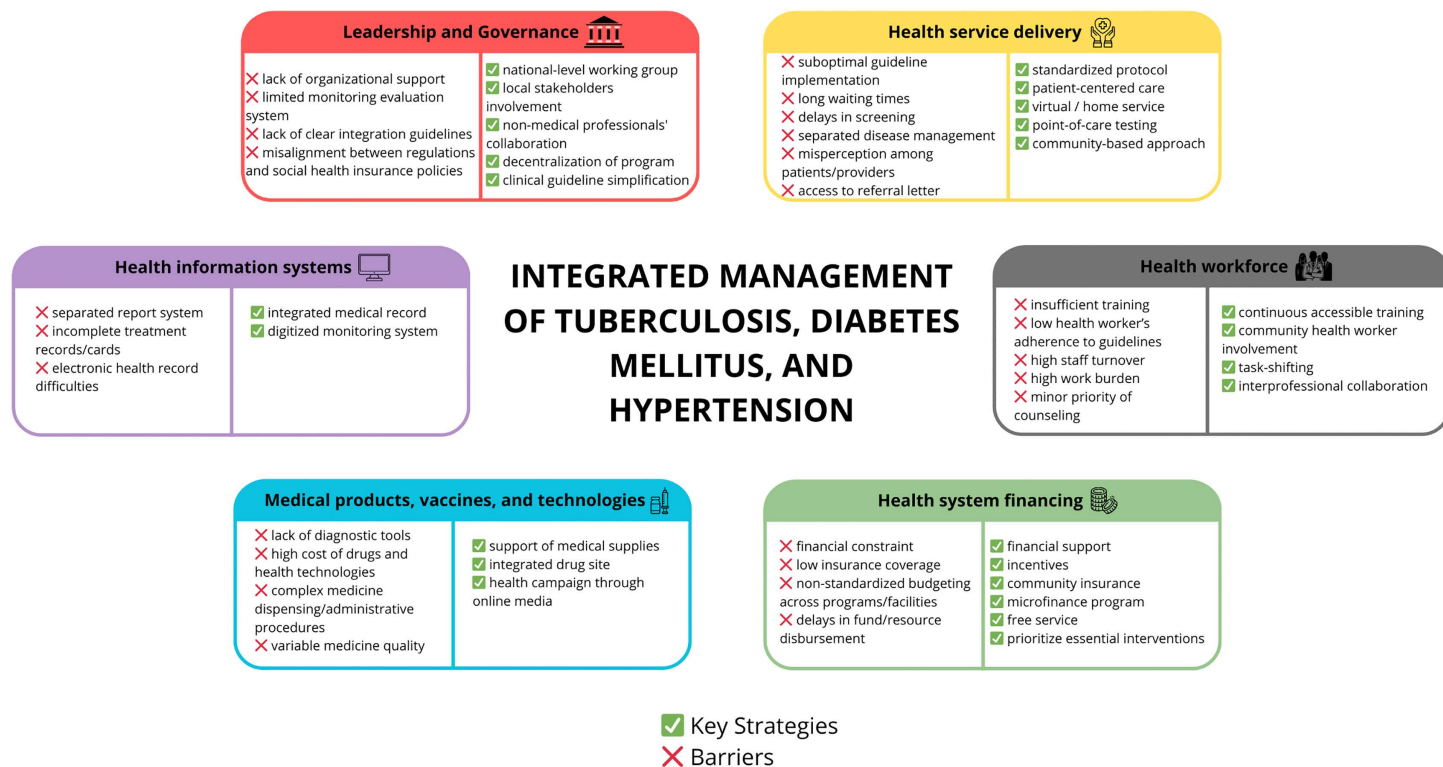

**Fig 3. Summary of the barriers and key strategies of TB, DM, and hypertension integrated management.**

<https://doi.org/10.1371/journal.pone.0345708.g003>

## Leadership and governance

**Barriers.** Integration of disease management needed a roadmap to be a crucial step in making a strategic plan for a health program that is expected to ensure the effectiveness of an implementation. It can be delayed for several reasons: external interference and non-specific guidelines [19,23,38,105–109]. Inadequate guidelines remain a significant challenge in healthcare systems, particularly in LMIC. Research highlights that the absence of well-defined, evidence-based, and locally tailored guidelines hinders effective healthcare delivery [19,23,38,105–109]. Previous studies emphasize the need for robust frameworks to guide clinical practices [19,23,38,105–109]. Without such frameworks, healthcare providers face difficulties in standardizing care, leading to inconsistent outcomes and inefficiencies [19,23,38,105,107,108].

The problem is further exacerbated by ambiguous governmental strategies, alongside insufficient support and leadership from the pertinent organizations [19,23,105–111]. Some studies underscore the importance of strong governmental commitment and leadership in implementing healthcare initiatives [19,23,105–107,109–111]. The lack of strategic direction often results in fragmented efforts, where policies fail to align with on-the-ground realities [19,23,38,105–109]. This misalignment varies significantly across economic contexts in LICs like Ethiopia and Malawi, leadership gaps often result in a total lack of essential screening and diagnostic equipment (e.g., glucose sticks) and medications [17,23,40,59,104–106]. Conversely, in middle income countries such as India, Indonesia, and Vietnam, the challenge shifts from resource scarcity to a lack of coordination between robust public and private sectors, leading to doctor shopping and data fragmentation [36,38,112,107,113]. These gaps lower the effectiveness of interventions and erodes trust among stakeholders [19,23,36,38,105–111].

Another critical issue is the absence of systems to monitor and evaluate the integration of healthcare services [18,23,56,71,96,97,105]. Monitoring frameworks are essential to assess progress, identify gaps, and ensure accountability [18,23,56,71,96,97,105]. Several studies highlight that without proper evaluation mechanisms, it becomes challenging to measure the success or shortcomings of integration efforts [18,23,56,71,96,97,105]. This lack of oversight undermines efforts to improve healthcare delivery and limits opportunities for continuous improvement [18,23,71,96,97,105]. Better data collection is also crucial for informed decision-making [18,56,71,95–97].

Lack of a content-specific guideline; for example, DM-HT-specific plans rather than NCDs in general [19,23,38,69,105,106,108,109]. This is important for healthcare managers to understand their leadership roles and commitments and to understand the big roadmap instead of focusing on their mechanisms [19,23,38,69,105,106,108,109]. In addition, a country's health goals should be prioritized by local evidence from in-country research and not influenced by external funding organizations [38,105–107,109,111,114].

**Key strategies.** In terms of policy, integrated disease management needs collaboration with the health authorities, supporting organizations or communities, having specific-explicit guidelines [19,20,23,38,40,57,69,105,106,108,109], and decentralization [28,30,32,72,84–86,93,115,116]. Partnership will result in a continued activity, improve patient health indicators and increase participation [41,61,73,110,111,116–121]. Financial constraints were less likely to be found in supported programs [25,42–44,48,50,51]. Engagement with providers and communities will strengthen the interaction with the community, building awareness and trust [19,30,33,41,58,60,70,83,118,120]. Community participation in the planning and implementation of health centers is suggested to improve the quality of care and to create a transparent accountable system [27,28,30,33,41,73,120]. Lastly, embedding integrated disease management into a national disease control strategy will make these programs more scalable and sustainable [9,18,38,69,105,109,122–134].

The guidelines are implemented as diagnostic and management guidance directly [18,21,23,57,69,105,106,108,109,122–125,133–136] or in the form of a digital application [18,56,62,137,92–95,97,115,138]. Integration of programs into pre-existing clinics is favored to reduce existing limitations, such as a lack of human resources or infrastructure [17,32,41,50,51,61,71,72,84–86,110,116,118,139]. Further, combined with technology support, decentralized care also addresses the critical shortage of health service providers [18,28,30,32,56,72,84–86,92,93,115,116]. While both settings benefit, digital interventions yield the most transformative gains in rural areas by bypassing geographic

barriers and lack of diagnostic infrastructure [32,33,66,80,92,93,115,116,138], given digital support is adequate. Conversely, in urban settings, digital support primarily addresses the complexities in data recording and reporting as well as fragmented care across multiple providers, ensuring longitudinal continuity [18,36,56,62,75,92,95,97,107]. The key to successful decentralization is mentoring of the health workers [28,30,31,33,84–86,93,115,119,140,141]. Efforts also include collaborations between academic institutions, healthcare facilities, and community-based programs to enhance diabetes and hypertension management [31,48,73,119–121,140–144].

## Health service delivery

**Barriers.** Several factors can hinder effective healthcare delivery and management. One challenge involves expensive partnerships with the private sector, which can strain resources and potentially prioritize profit over patient care [16,110,146]. Many individuals face a lack of access and financial support when seeking referral care, creating barriers to necessary medical services [15,17,23,29,36–39,49,58,64,69,90,101,103,105,110]. Poor clinic health systems further exacerbate these issues, potentially leading to inadequate care and management [17,23,34,37,38,40,41,59,104,105,110].

Inefficient processes also contribute to these challenges, as healthcare interventions can be time-consuming for both providers and patients [14,23,29,34–37,39,41,58,64,90,145]. A limited awareness of collaborative frameworks and separated disease management approaches can hinder coordinated care efforts [17,19,23,38,81,103,105–110,118]. The absence of early detection and management systems can result in delayed interventions and poorer health outcomes [19,21,23,40,52,54,59,103,104,135,146–149]. Barriers like long waiting time were also faced in the integration of diseases [14,23,29,32,34–37,39,41,58,74,90].

Furthermore, poor recording and reporting systems can compromise data accuracy and hinder effective monitoring and evaluation [18,23,56,71,81,95–97,105,107]. Suboptimal guideline implementation can lead to inconsistencies in care delivery and missed opportunities for evidence-based practice [19,23,38,57,81,105,106,108,109,135]. A lack of emphasis on physical or dietary interventions may limit the scope of treatment and preventive care [32,60,77,83,137,90,142]. The loss of referral letters, limited DM services, and long waiting times further impede access to timely and appropriate care [23,29,36,37,39,40,58,59,64,90,103–105]. Inconsistent communication, such as reminders not being delivered to intended patients and retention by specialists, can disrupt continuity of care [36,56,58,64,74,88,89,103].

**Key strategies.** Improving healthcare delivery for patients with chronic and infectious diseases requires a multifaceted approach that includes referral systems, counseling, and service integration. Strengthening referral mechanisms to higher-level health facilities and enabling two-way referral systems ensures continuity of care and proper case management [24,26,30,35,36,52–57,58,64,69,72,74,77,137,103,104,115,119,150–152]. At the community level, counseling and health education are essential for improving patient awareness, engagement, and treatment adherence. Integrating services—such as for TB, diabetes, and NCDs—creates more efficient care pathways and reduces fragmentation [9,17,21–24,26,31,32,36,41,50–54,112,61,67–69,71–74,80,81,84–86,104,105,110,115,116,118,152–155]. Supporting this, chronic disease outreach programs, post-discharge community care, and home visits extend care access beyond traditional clinical settings [24,26–28,32,46,48,66,67,70,84,94,102,116,121,156,157].

Advancing care quality also involves implementing standardized protocols, algorithm-based treatments, and clinical decision support systems to guide evidence-based practices [18,20,21,23,56,57,112,69,76,92,109,122–125,133–136,150,153,158]. Tools such as simple screening forms, mobile health applications for reminders, and point-of-care testing improve efficiency and early diagnosis [18,21,24,26,27,45–47,54–57,62,66,67,76,80,92–95,97,115,135,138,142,149,150,159]. Moreover, patient-centered care—including individualized medication plans, tailored education, and peer-group-based interventions—ensures that care is responsive to individual needs and improves self-efficacy [14,25,38,48,49,60,68,70,73,77,78,82,83,137,90,92,119,121,142,157]. Digital health innovations, like virtual consultations, mobile phone apps for tracking lifestyle and self-measurements, and home-based or mobile screening clinics, enhance accessibility and promote patient self-management [18,24,26,27,32,33,46,56,62,66,67,76,80,91–95,97,102,115,116,121,138,142].

Furthermore, strategies that target early detection and underserved populations—such as active case finding, targeted and home-based screening, and developing tailored screening models—are vital to reducing diagnostic delays and addressing health disparities [21,22,24,26–28,45–47,52–55,66,67,70,92,116,135,147–149,159,160]. Special screening efforts like TB screening in high-risk DM patients, mental health screening for HIV/NCD patients, and group medical visits with community health workers add further depth to patient-centered care [25,28,47,48,73,92,121,141,161]. Ensuring after-hours clinic availability, promoting community-based approaches, and coordinating with specialists round out a comprehensive framework that prioritizes continuity, personalization, and accessibility in healthcare services [24–28,30,33,36,41,58,60,64,66,67,70,74,84,88–90,103,116,119–121,155].

## Health workforce

**Barriers.** Healthcare service delivery is often challenged by significant human resource constraints. A major issue is chronic understaffing, which is exacerbated by high staff turnover, frequent absenteeism, and a heavy workload borne by the remaining personnel [19,23,33–35,37–41,55,162,59,81,83,84,93,105,108,110,154]. These conditions are further strained by short training durations [19,23,33,34,38–40,57,59,84,93,104,105,108] and limited opportunities for skill development, leading to competency gaps among healthcare workers [19,21,23,33,34,38–40,57–59,162,71,84,93,104,105,108]. Inadequate training not only undermines care quality but also contributes to poor adherence to clinical protocols [19,23,33,34,38,39,57,59,84,86,104,105,108]. As a result, service efficiency suffers, increasing the risk of burnout and compromising patient outcomes [19,23,33–35,39–41,162,59,84,93,105,108,110].

In addition to structural limitations, behavioral and organizational factors also affect healthcare performance. The lack of interprofessional collaboration [18,38,70,74–76,78,105–109,118,145,150,153,158] reduces the effectiveness of integrated care, while certain provider attitudes—such as overconfidence [16,86,146], unwillingness to engage [16,17,19,23,105,107,110,118], and the failure to prioritize counseling [19,60,77,83,84,90]—can hinder patient-centered care. The persistent risk of infection, especially in high-burden settings, further compounds these challenges [19,21,23,81,103,107,135]. Together, these issues highlight the need for comprehensive workforce strategies that include ongoing training, better staffing models, and systems that support collaboration and provider accountability [18,19,23,30,31,33,34,38,57,84–86,105,108,110].

The integration of management by health workers presents a significant challenge to implementing effective health programs caused by human resource limitations [19,23,30,31,33,34,38,40,57,59,84,105,108,110]. This has led to the concept of empowering community health workers (CHWs) to bridge this gap [27,28,30,33,73,84–86,119,121,140,141] especially in LMICs. To effectively utilize CHWs, several factors must be considered [28,30,33,73,84–86,119,121,141].

Engagement in care is influenced by personal motivation, patient-provider relationships, and social support. Key facilitators include personal initiative, education, positive provider-patient interactions, and support from family and community. Integrated care services and social support are essential for enhancing patient engagement and adherence in LMICs [25,30,33,58,60,61,73,83,90,118].

**Key strategies.** Strengthening human resources through targeted capacity-building interventions is essential for improving healthcare delivery. One of the most frequently implemented strategies is the training of both health workers and non-health workers, which plays a critical role in enhancing knowledge, skills, and service quality [19,21,23,28,30,31,33,34,38–41,55,57,162,59,83–86,93,104,105,108,110,119,140,141]. Training methods have expanded to include continuous and accessible formats, such as web-based learning [18,56,96], and are often tailored to be context-specific and user-friendly, particularly for community health workers (CHWs) [28,30,33,85,86]. These efforts are further reinforced by formal linkages to professional associations, which help maintain standards and peer support networks [121,144].

In addition to training, several complementary strategies support workforce optimization. Task-shifting—delegating certain clinical tasks to trained lower-level workers—has proven effective in addressing workload challenges and improving

service access [18,27,28,30,33,84–86,119,121,141]. Task shifting from healthcare workers to community workers requires strict supervision, including community visits and routine evaluations. CHWs should be selected by local leaders and equipped with adequate knowledge and resources, supported through remuneration. Facilities may include dedicated buildings for CHWs, phones, and transportation allowances [27,28,30,33,73,85,86,119,121]. Additionally, specialty-trained CHWs can enhance patient trust and confidence [28,30,33,119,121,140,141]. Non-physicians can also play a role in integrated disease management by conducting motivational interviewing and monitoring patients with comorbidity conditions, which has been shown to improve treatment outcomes [27,28,30,33,73,83–86,121,140,141].

In some settings, hiring additional temporary staff has helped alleviate workforce shortages [34,84]. Moreover, inter-professional collaboration—involving dietitians, nurses, pharmacists, and counselors—enhances integrated care delivery and supports a more holistic approach to patient management [18,38,70,74–76,78,105–109,118,143–145,150,153,158]. Community health workers play a vital role in ongoing patient support, particularly when empowered with proper guidance, training, and integration into care teams [27,28,30,33,73,84–86,119,121,140,141]. Together, these strategies create a more resilient, adaptive, and patient-centered health workforce.

## Health information systems

**Barriers.** Challenges in health information systems continue to hinder efficient service delivery and patient management. One common issue is the incomplete documentation of treatment cards, which compromises the accuracy of patient records and continuity of care [57,82,105]. In addition, many healthcare workers face difficulties operating electronic medical records due to a lack of training or system complexity [56,62,93,95–97,115]. Even when electronic medical records are used, their functional limitations often restrict their ability to support comprehensive data management and care coordination [95–97,115]. In some cases, the absence of individual patient records further complicates the ability to track treatment progress and outcomes [23,71,96,105].

Fragmentation within health information systems also contributes to inefficiencies. The use of separated reporting systems creates duplication of work and reduces the integration of critical data across services [23,29,81,82,95–97,105,107]. This is compounded by poor data management practices, which lead to inconsistencies and reduce the reliability of health information for decision-making [18,23,71,81,82,95–97,105,107,111]. Furthermore, difficulties in data retrieval and cross-verification limit the ability to validate and analyze data accurately [82,95–97]. Addressing these systemic issues is essential to ensure accurate documentation, streamline workflows, and support evidence-based care planning [18,56,71,93,95–97,115].

**Key strategies.** The use of digital tools and electronic medical records (EMRs) is increasingly recognized as a critical component in enhancing healthcare service delivery and data management. Electronic medical records support accurate documentation and streamlined access to patient information, facilitating better clinical decision-making and continuity of care [18,56,62,71,92–97,115,138]. Alongside electronic medical records, traditional treatment cards remain in use as supplementary tools for tracking patient care, especially in settings where full digitization is not yet feasible [56,57,76,82,105,135]. Some systems also employ parallel registration methods that integrate a patient's medical history to improve coordination between services [52,56,95,96]. In addition, digitized monitoring systems enable real-time tracking of treatment progress and patient outcomes, which strengthens follow-up and program evaluation [18,36,56,62,71,92–97,115].

To enhance the functionality of these systems, healthcare providers are adopting integrated technology platforms that assess patient risk levels and generate tailored care recommendations [18,56,62,92–95,97,115]. These platforms often combine multiple functions, such as incorporating medical guidelines, health insurance details, and medicine availability into a single, integrated medical record [18,56,95–97,115]. Furthermore, electronic applications designed to support guideline-based assessments and clinical management are being implemented to improve adherence to standards of care and reduce clinical errors [18,56,62,92,93,95,97,115]. These innovations contribute to a more efficient, coordinated, and patient-centered health-care system, especially when aligned with supportive infrastructure and training [18,56,62,71,92–97,115,138].

## Medical products, vaccines, and technologies

**Barriers.** A key barrier to effective healthcare service delivery is the shortage of essential medications and diagnostic equipment. Many facilities report frequent stockouts of both medicines and tools needed to properly evaluate and manage patients [14,16,17,19,21,23,33–35,37–41,57,162,59,83,84,93,105,108,110,135,154]. In several cases, diagnostic equipment is either unavailable or insufficient, limiting the ability to conduct timely and accurate assessments [20,23,37,38,40,59,105]. These resource gaps undermine clinical decision-making and compromise patient care, particularly in high-burden or under-resourced settings [17,19,23,33,34,37,38,40,59,105,108].

Cost-related issues further exacerbate access challenges. The high price of drugs and expensive medical technologies makes it difficult for both healthcare systems and patients to afford consistent treatment and diagnostic services [15–17,25,37,39,49,58,101,105,110]. Additionally, inefficient procurement systems, including the lack of standardized procedures for medicine requests, contribute to recurring shortages and delays [23,81,105,108,109,111]. In certain settings, the availability of non-standard or low-quality medications introduces an additional layer of concern, potentially impacting treatment efficacy and patient safety [16]. Addressing these supply chain and cost barriers is crucial to ensuring reliable, high-quality care across all levels of healthcare [16,23,38,59,81,105,108–111].

**Key strategies.** To strengthen healthcare delivery, ensuring the availability of essential medical equipment and medications is a critical priority. Efforts to provide the necessary medical tools and diagnostic equipment can significantly improve service readiness and patient care quality [20,23,38,40,57,59,84,105]. Similarly, ensuring consistent access to required medications, particularly for chronic and infectious diseases, helps maintain treatment adherence and reduces the risk of complications [14,16,17,38,39,49,57,59,83,105,108,110]. Establishing integrated, centralized drug collection points has also proven effective in improving medicine distribution efficiency and access, especially in underserved areas [17,32,85,87,116,149].

## Health system financing

**Barriers.** Financial limitations remain a significant barrier to effective healthcare delivery. Health systems often face budgetary constraints, including unstandardized budget allocations across facilities and delays in the distribution of allocated funds, which can disrupt service planning and delivery [23,33,34,37–41,49,58,59,162,83,101,105,108,110,111]. These systemic issues limit the capacity to maintain essential services, hire adequate staff, and procure necessary supplies [23,34,38,40,59,105,108,110,111]. Inconsistent financial planning across healthcare institutions further contributes to inequities in service provision and weakens the overall efficiency of health programs [101,111].

On the patient side, financial barriers significantly affect access to care and adherence to treatment. Many patients struggle with out-of-pocket costs, particularly in the absence of adequate insurance coverage [15–17,25,26,38,39,49,57,58,60,83,101,110,149]. These financial difficulties often lead to reduced medication adherence, delayed treatment, or the selective provision of medications based on a patient's ability to pay [16,39,49,58,60,90,101,110]. Ultimately, these constraints not only affect individual health outcomes but also undermine broader public health goals. Addressing both systemic and patient-level financial barriers is essential to ensure equitable and sustainable healthcare access [15–17,25,38,39,49,58,101,110].

**Key strategies.** Integrated screening is beneficial over a symptom-based approach due to the marginal costs for the integration being less compared to stand-alone screening programs [43,45,47,50,51]. Supports from the government was important to make the screening program integrated across diseases [38,104,109–111,122–134].

Funding opportunities in the existing health service delivery system can be a good opportunity to leverage resources for integration and to reduce patients' out-of-pocket expenditure [25,42–44,48,50,51,110]. The government-supported insurance or microfinance or the implementation of community health insurance which is offered at a low cost might clarify the barrier cost [25,48,49,104]. This is further evidenced by the rising number of individuals seeking medical care in response to available incentives [24,25,27].

A study by Pastakia et al., showed focus on community-based care for hypertension and diabetes by targeting peer/microfinance groups, education, and treatment in the community by maintaining economic sustainability and incentives [75]. The results were substantial savings among participants and significantly impacted chronic disease care in low-resource settings [25,48,73]. Cost saving can be done by screening by targeting high-risk diabetic patients with specific factors like low body mass index, high fasting blood glucose, and low triglycerides for screening was found to be more cost-effective [47].

## Discussion

Integration of three diseases (TB, DM, and hypertension) is very promising, but nowadays integration is limited to two diseases. For example, only DM and hypertension or DM and TB. Combining two diseases into one integrated intervention is already challenging. The critical gaps include shortages of essential medicines, screening and diagnostic supplies, and equipment, as well as inadequate human resources. Furthermore, healthcare workers possess insufficient knowledge and skills required to effectively manage both diseases. Patient attendance remains low, compounded by limited awareness and insufficient understanding of the associated service delivery guidelines and operational frameworks [19,23,33,34,38,40,59,93,104,105,108]. Unfortunately, many global health donors give disease-specific funding such as NCDs or TB and rarely give funding that is integration-based [116], and the budget that the government gives is not adequate [23,34,59,105,108,110,111]. Integration has been proven to save costs [25,42,43,45–48,50,51]. Thus, health equity funds should be redesigned to ensure they provide adequate financial protection for patients living with NCDs [25,49,101]. However, the drivers of cost savings differ across settings. In urban areas, savings are often achieved through economies of scale, shared infrastructure, and higher patient throughput [42,43,50,51]. In rural areas, cost-effectiveness may arise from preventing expensive late-stage complications, reducing travel burden, and improving linkage to care through community-based delivery models [25,27,45–48,73]. Therefore, evaluations of integrated care should consider both provider costs and patient-incurred costs, especially in remote settings [15,25,42–44,46,48,49,101].

DM and hypertension integration is vast compared to other integrations. Understandably, as both DM and hypertension are NCDs, DM and hypertension integration is preferred over tuberculosis and NCDs integration due to the shared NCDs risk factors, higher population prevalence, and less stigma [63,76,137,87,163,164]. On the contrary, TB and hypertension case integration is the least due to their weaker direct connection. There are many guidelines for DM and hypertension [69,165,166] and TB and DM [122–125,133,167]. There are currently no guidelines that focus on TB and hypertension. Adding a third disease would require reworking indicators, patient records, reporting tools, and training health workers to record and act on more complex patient profiles [18,23,56,95–97,105]. Integration of three diseases, TB, DM, and hypertension, could find new cases of hypertension and diabetes among TB patients. This is one of the good forms of integration with NCDs and was considered feasible and acceptable [20–22,26,54,61,104,130,131].

In low-income countries, the implementation of integrated care models is often constrained by fundamental health system gaps. Several structural barriers persist, including a lack of screening and diagnostic equipment, as well as limited access to essential medicines and laboratory services, which are frequently not provided free of charge. In addition, weak health information systems are characterized by poor record-keeping, inadequate reporting mechanisms, and limited feedback and referral systems [17,23,34,37,38,40,57,59,104,105]. These challenges are compounded by a shortage of supporting agencies and implementation partners, as well as insufficient training among healthcare workers, which limits their capacity to effectively deliver integrated services [19,23,31,33,34,38,40,57,59,105,108,110].

Operational challenges are also more pronounced in these settings. Integration can lead to clinic flow delays and place additional strain on an already limited workforce, increasing workload without proportional resource expansion [19,21,23,33–35,40,59,105,108]. Furthermore, a lack of prioritization and insufficient allocation of resources to integrated programs can hinder their sustainability [19,23,33,34,40,59,105,108,110,114]. From the patient perspective, fear of

screening or diagnosis may also arise when treatment options are unreliable or unavailable, reducing uptake of services and ultimately weakening the intended benefits of integration [16,17,23,38,39,49,52,58,72,105,107,110,149].

In contrast, while middle-income countries may have relatively stronger health system infrastructure, challenges tend to arise at the level of implementation efficiency. In these contexts, task-shifting may not always yield the desired outcomes. Health workers are often already overburdened, and the redistribution of tasks can exacerbate workload pressures rather than alleviate them [18,30,84–86,93,108,156]. Moreover, insufficient coordination, supervision, and role clarity can reduce the effectiveness of task-shifting approaches, leading to inefficiencies and potential declines in quality of care [19,23,30,33,38,41,85,86,105,107,108,110,158].

Key recommendations include strengthening health systems, promoting patient-centered care, and increasing funding for NCDs research. Proposed solutions involve task sharing, enhancing procurement practices, and utilizing older medications. Effective care delivery requires standardized guidelines, training, supervision, and robust data collection systems. The study stresses the importance of context-specific approaches, patient empowerment, and community-based interventions [18,23,30,32,33,38,57,69,73,85,86,93,105,109,110,114,168].

### Public health implications

Integrating TB, DM, and hypertension management requires a comprehensive and structured approach. Governments and health institutions need to develop policies that support the integration of these services [124–134,169,170]. Once policies are in place, the next step is to integrate TB, DM, and hypertension management at the healthcare facility level [20–23,61,104,124,125,130,131,152,170]. This means patients can receive comprehensive and coordinated care from a multidisciplinary healthcare team [18,75,78,118,143,144,150,153,171]. To support service integration, an integrated health information system needs to be developed [18,56,98–100,172]. This system can track and manage patient data for TB, DM, and hypertension, and facilitate communication between patients and healthcare staff [18,56,95–97,172]. Additionally, developing adequate human resources is crucial [19,23,30,33,34,38,84–86,105]. Healthcare staff need to be trained and developed to provide integrated management [18,19,23,30,31,33,34,38,57,84–86,105]. A multidisciplinary team needs to be developed to provide comprehensive care [18,77,80,120,144,145,151,154,171]. Adequate financing is also essential to support the integration of TB, DM, and hypertension management [25,42,43,50,51,110,173]. Innovative financing models need to be developed to ensure the sustainability of integrated services [25,42,43,48,50,51,173]. Integrating TB, DM, and hypertension management can lead to improved health outcomes, enhanced patient satisfaction, and more efficient healthcare delivery, then improving patient outcomes and reducing the disease burden in the community [9,21,22,50,51,63,72,76,107,153,154,170]. National implementation strategies should differentiate between urban and rural settings. Urban models may prioritize integrated facility-based chronic disease hubs supported by interoperable digital systems, where higher patient volumes and stronger referral capacity can improve efficiency and continuity of care [18,36,56,64,77,95,98,100]. In contrast, rural models may require task-sharing, mobile clinics, telehealth, and community health worker networks to overcome workforce shortages, transport barriers, and geographic inaccessibility [26–28,30,32,33,68,75,82,87,88,96,117,118]. Mobile and outreach-based integrated screening programs have also shown strong linkage-to-care potential for underserved populations, particularly where routine facility access is limited [24,26,27,68,69,118].

### Limitations and strengths

This is the first scoping review discussing the integration of TB, DM, and hypertension. This scoping review represents a significant undertaking in synthesizing the existing literature on the integration of TB, DM, and hypertension management. This scoping review can contribute to the field of public health, providing a comprehensive overview of the integration of TB, DM, and hypertension management. Our findings can inform policy development, practice improvement, and future research.

The limitations of this study relied primarily on qualitative studies when measuring the effects of integration. Experimental study designs, which focus on manipulating variables to establish causal relationships, provide stronger evidence but are often underrepresented in this review. While qualitative studies offer rich, contextual insights into behaviors and experiences, they cannot establish causality and are often limited in generalizability. This imbalance in research methodologies makes it difficult to draw clear and definitive conclusions about the impact of integration.

## Conclusions

This scoping review highlights the potentials, barriers, and key strategies of integrating TB, DM, and hypertension case management to improve case detection, continuity of care, patients satisfaction, and health system efficiency. Integrated approaches can reduce duplication of services and lower costs, particularly when supported by task-sharing, shared infrastructure, and strong referral systems. However, sustainability remains constrained by financing gaps, weak infrastructure, fragmented information systems, and workforce shortages. Importantly, implementation needs differ across contexts: urban settings may benefit from scale and stronger facility systems, whereas rural settings require decentralized and community-based approaches to overcome access barriers. Future research should prioritize long-term outcomes, implementation effectiveness, and comparative cost-effectiveness across diverse health system settings.

## Supporting information

### S1 Table. Description of selected studies.

(DOCX)

### S2 Table. Barriers and key strategies of integrating TB, DM, and hypertension management.

(DOCX)

### S1 File. Preferred reporting items for systematic reviews and meta-analyses extension for scoping reviews (PRISMA-ScR).

(DOCX)

## Author contributions

**Conceptualization:** Ari Probandari, Kyra Modesty, Ailiana Santosa, Nawi Ng, Vitri Widyaningsih.

**Data curation:** Ari Probandari, Kyra Modesty, Vivienne Tjung, Brigitta Ellycia Sitepu, Febby Gunawan Siswanto, Kerub Dion, Victoria Sari.

**Formal analysis:** Ari Probandari, Kyra Modesty, Vivienne Tjung, Brigitta Ellycia Sitepu, Febby Gunawan Siswanto, Kerub Dion, Victoria Sari.

**Funding acquisition:** Ari Probandari, Vitri Widyaningsih.

**Investigation:** Kyra Modesty, Vitri Widyaningsih.

**Methodology:** Ari Probandari, Kyra Modesty, Brigitta Ellycia Sitepu, Kerub Dion, Vitri Widyaningsih.

**Project administration:** Ari Probandari, Vitri Widyaningsih.

**Resources:** Ari Probandari, Kyra Modesty, Febby Gunawan Siswanto, Vitri Widyaningsih.

**Software:** Kyra Modesty, Vivienne Tjung, Brigitta Ellycia Sitepu, Febby Gunawan Siswanto, Victoria Sari.

**Supervision:** Ari Probandari, Ailiana Santosa, Nawi Ng, Vitri Widyaningsih.

**Validation:** Ari Probandari, Kyra Modesty, Vivienne Tjung, Victoria Sari, Vitri Widyaningsih.

**Visualization:** Kyra Modesty, Brigitta Ellycia Sitepu.

**Writing – original draft:** Ari Probandari, Kyra Modesty.

**Writing – review & editing:** Ari Probandari, Kyra Modesty, Vivienne Tjung, Brigitta Ellycia Sitepu, Febby Gunawan Siswanto, Kerub Dion, Victoria Sari, Ailiana Santosa, Nawi Ng, Vitri Widyarningsih.

## References

1. NCDs at a glance 2025 NCDs surveillance and monitoring: Noncommunicable disease mortality and risk factor prevalence in the Americas. 2025.
2. Magliano DJ, Boyko EJ. IDF Diabetes Atlas. Brussels. 2021. <https://www.ncbi.nlm.nih.gov/books/NBK581934/>
3. Naha S, Gardner MJ, Khangura D, Kurukulasuriya LR, Sowers JR. Hypertension in Diabetes. Diabetes and Kidney Disease, Second Edition. 2021. 263–91.
4. Global Tuberculosis Report 2024. <https://www.who.int/teams/global-programme-on-tuberculosis-and-lung-health/tb-reports/global-tuberculosis-report-2024>
5. World Health Organization. Tuberculosis. 2025. <https://www.who.int/news-room/fact-sheets/detail/tuberculosis>
6. Abbas U, Masood KI, Khan A, Irfan M, Saifullah N, Jamil B, et al. Tuberculosis and diabetes mellitus: Relating immune impact of co-morbidity with challenges in disease management in high burden countries. J Clin Tuberc Other Mycobact Dis. 2022;29:100343. <https://doi.org/10.1016/j.ijctube.2022.100343> PMID: 36478777
7. O'Neil S, Taylor S, Sivasankaran A. Data equity to advance health and health equity in low- and middle-income countries: a scoping review. Digit Health. 2021;7:20552076211061920.
8. Peiris D, Feyer A-M, Barnard J, Billot L, Bouckley T, Campaign A, et al. Overcoming silos in health care systems through meso-level organisations - a case study of health reforms in New South Wales, Australia. Lancet Reg Health West Pac. 2024;44:101013. <https://doi.org/10.1016/j.lan-wpc.2024.101013> PMID: 38384947
9. Nyirenda JLZ, Bockey A, Wagner D, Lange B. Effect of Tuberculosis (TB) and Diabetes mellitus (DM) integrated healthcare on bidirectional screening and treatment outcomes among TB patients and people living with DM in developing countries: a systematic review. Pathog Glob Health. 2023;117(1):36–51. <https://doi.org/10.1080/20477724.2022.2046967> PMID: 35296216
10. Arksey H, O'Malley L. Scoping studies: towards a methodological framework. Int J Soc Res Methodol. 2005;8(1):19–32. <https://doi.org/10.1080/1364557032000119616>
11. Widyarningsih V, Febrinasari RP, Sari V, Augustania C, Verlita B, Wahyuni C, et al. Potential and challenges for an integrated management of tuberculosis, diabetes mellitus, and hypertension: A scoping review protocol. PLoS One. 2022;17(7):e0271323. <https://doi.org/10.1371/journal.pone.0271323> PMID: 35819954
12. Aromataris E, Lockwood C, Porritt K, Pilla B, Jordan Z. JBI Manual for Evidence Synthesis. JBI Manual for Evidence Synthesis. 2024. <https://synthesismanual.jbi.global>
13. Monitoring the building blocks of health systems: a handbook of indicators and their measurement strategies. <https://iris.who.int/handle/10665/258734>
14. Ottaru TA, Wood CV, Butt Z, Hawkins C, Hirschhorn LR, Karoli P, et al. "I only seek treatment when I am ill": experiences of hypertension and diabetes care among adults living with HIV in urban Tanzania. BMC Health Serv Res. 2024;24(1):186. <https://doi.org/10.1186/s12913-024-10688-8> PMID: 38336716
15. Rupani MP, Vyas S. A sequential explanatory mixed-methods study on costs incurred by patients with tuberculosis comorbid with diabetes in Bhavnagar, western India. Sci Rep. 2023;13(1).
16. Tusubira AK, Akiteng AR, Nakirya BD, Nalwoga R, Ssinabulya I, Nalwadda CK, et al. Accessing medicines for non-communicable diseases: Patients and health care workers' experiences at public and private health facilities in Uganda. PLoS One. 2020;15(7).
17. Pfaff C, Scott V, Hoffman R, Mwagomba B. You can treat my HIV – but can you treat my blood pressure? Availability of integrated HIV and non-communicable disease care in northern Malawi. Afr J Prim Health Care Fam Med. 2017;9(1):1151.
18. Jindal D, Sharma H, Gupta Y, Ajay VS, Roy A, Sharma R, et al. Improving care for hypertension and diabetes in india by addition of clinical decision support system and task shifting in the national NCD program: I-TREC model of care. BMC Health Serv Res. 2022;22(1):688. <https://doi.org/10.1186/s12913-022-08025-y> PMID: 35606762
19. Salifu RS, Hlongwana KW. Frontline healthcare workers' experiences in implementing the TB-DM collaborative framework in Northern Ghana. BMC Health Serv Res. 2021;21(1):861. <https://doi.org/10.1186/s12913-021-06883-6> PMID: 34425809
20. Chamba NG, Byashalira KC, Shayo PJ, Ramaiya KL, Manongi RN, Daud P, et al. Where can Tanzania health system integrate clinical management of patients with dual tuberculosis and diabetes mellitus? A cross-sectional survey at varying levels of health facilities. Public Health Pract (Oxf). 2022;3:100242. <https://doi.org/10.1016/j.puhip.2022.100242> PMID: 36101768
21. Anand T, Kishore J, Isaakidis P, Gupte HA, Kaur G, Kumari S, et al. Integrating screening for non-communicable diseases and their risk factors in routine tuberculosis care in Delhi, India: A mixed-methods study. PLoS One. 2018;13(8):e0202256. <https://doi.org/10.1371/journal.pone.0202256> PMID: 30138331

22. Segafredo G, Kapur A, Robbiati C, Joseph N, de Sousa JR, Putoto G. Integrating TB and non-communicable diseases services: Pilot experience of screening for diabetes and hypertension in patients with tuberculosis in Luanda, Angola. *PLoS One*. 2019;14(7):e0218052.
23. Nunemo MH, Gidebo KD, Woticha EW, Lemu YK. Integration Challenges and Opportunity of Implementing Non-Communicable Disease Screening Intervention with Tuberculosis Patient Care: A Mixed Implementation Study. *Risk Manag Healthc Policy*. 2023;16:2609–33. <https://doi.org/10.2147/RMHP.S432943> PMID: 38045564
24. Govindasamy D, Kranzer K, van Schaik N, Noubary F, Wood R, Walensky RP, et al. Linkage to HIV, TB and non-communicable disease care from a mobile testing unit in Cape Town, South Africa. *PLoS One*. 2013;8(11):e80017. <https://doi.org/10.1371/journal.pone.0080017> PMID: 24236170
25. Rosenberg M, Amisi JA, Szkwarko D, Tran DN, Genberg B, Luetke M, et al. The relationship between a microfinance-based healthcare delivery platform, health insurance coverage, health screenings, and disease management in rural Western Kenya. *BMC Health Serv Res*. 2020;20(1):868. <https://doi.org/10.1186/s12913-020-05712-6> PMID: 32928198
26. Millones AK, Cohen S, Acosta D, Campos H, Condeso A, Farroñay S, et al. Adapting a mobile TB screening unit to provide integrated screening services and linkage to primary care. *Public Health Action*. 2024;14(4):169–74. <https://doi.org/10.5588/pha.24.0025> PMID: 39618835
27. Chamie G, Kwarisiima D, Clark TD, Kabami J, Jain V, Geng E, et al. Leveraging rapid community-based HIV testing campaigns for non-communicable diseases in rural Uganda. *PLoS One*. 2012;7(8).
28. Thomas LS, Buch E, Pillay Y. An analysis of the services provided by community health workers within an urban district in South Africa: a key contribution towards universal access to care. *Hum Resour Health*. 2021;19(1):1–11.
29. van Pinxteren M, Mbokazi N, Murphy K, Mair FS, May C, Levitt N. The impact of persistent precarity on patients' capacity to manage their treatment burden: A comparative qualitative study between urban and rural patients with multimorbidity in South Africa. *Front Med (Lausanne)*. 2023.
30. Ingenhoff R, Munana R, Weswa I, Gaal J, Sekitoleko I, Mutabazi H, et al. Principles for task shifting hypertension and diabetes screening and referral: a qualitative study exploring patient, community health worker and healthcare professional perceptions in rural Uganda. *BMC Public Health*. 2023;23(1):881. <https://doi.org/10.1186/s12889-023-15704-w> PMID: 37173687
31. Joshi R, Behera D, Di Tanna GL, Ameer MA, Yakubu K, Praveen D. Integrated management of diabetes and tuberculosis in rural India - results from a pilot study. *Front Public Health*. 2022.
32. Kumar A, Schwarz D, Acharya B, Agrawal P, Aryal A, Choudhury N, et al. Designing and implementing an integrated non-communicable disease primary care intervention in rural Nepal. *BMJ Glob Health*. 2019;4(2):e001343. <https://doi.org/10.1136/bmjgh-2018-001343> PMID: 31139453
33. Chang H, Hawley NL, Kalyesubula R, Siddharthan T, Checkley W, Knauf F, et al. Challenges to hypertension and diabetes management in rural Uganda: a qualitative study with patients, village health team members, and health care professionals. *Int J Equity Health*. 2019;18(1).
34. Kachimanga C, Dibba Y, Patiño M, Gassimu JS, Lavallie D, Sesay S, et al. Implementation of a non-communicable disease clinic in rural Sierra Leone: early experiences and lessons learned. *J Public Health Policy*. 2021;42(3):422–38. <https://doi.org/10.1057/s41271-021-00304-y> PMID: 34497378
35. Otieno P, Agyemang C, Wainaina C, Igonya EK, Ouedraogo R, Wambiya EOA, et al. Perceived health system facilitators and barriers to integrated management of hypertension and type 2 diabetes in Kenya: a qualitative study. *BMJ Open*. 2023;13(8):e074274. <https://doi.org/10.1136/bmjopen-2023-074274> PMID: 37567749
36. Le Ho Thi Q-A, Pype P, Wens J, Nguyen Vu Quoc H, Derese A, Peersman W, et al. Continuity of primary care for type 2 diabetes and hypertension and its association with health outcomes and disease control: insights from Central Vietnam. *BMC Public Health*. 2024;24(1):34. <https://doi.org/10.1186/s12889-023-17522-6> PMID: 38166740
37. Chham S, Van Olmen J, Van Damme W, Chhim S, Buffel V, Wouters E. Scaling-up integrated type-2 diabetes and hypertension care in Cambodia: what are the barriers to health system performance?. *Front Public Health*. 2023;11.
38. Fazaludeen Koya S, Lordson J, Khan S, Kumar B, Grace C, Nayar KR, et al. Tuberculosis and Diabetes in India: Stakeholder Perspectives on Health System Challenges and Opportunities for Integrated Care. *J Epidemiol Glob Health*. 2022;12(1):104–12. <https://doi.org/10.1007/s44197-021-00025-1> PMID: 35006580
39. Badacho AS, Mahomed OH. Lived experiences of people living with HIV and hypertension or diabetes access to care in Ethiopia: a phenomenological study. *BMJ Open*. 2024;14(2).
40. Bintabara D, Ngajilo D. Readiness of health facilities for the outpatient management of non-communicable diseases in a low-resource setting: an example from a facility-based cross-sectional survey in Tanzania. *BMJ Open*. 2020;10(11).
41. Godongwana M, De Wet-Billings N, Milovanovic M. The comorbidity of HIV, hypertension and diabetes: a qualitative study exploring the challenges faced by healthcare providers and patients in selected urban and rural health facilities where the ICDM model is implemented in South Africa. *BMC Health Serv Res*. 2021;21(1):647. <https://doi.org/10.1186/s12913-021-06670-3> PMID: 34217285
42. Harkare HV, Osetinsky B, Ginindza N, Cindzi BT, Mncina N, Akomolafe B, et al. Human and financial resource needs for universal access to WHO-PEN interventions for diabetes and hypertension care in Eswatini: results from a time-and-motion and bottom-up costing study. *Hum Resour Health*. 2024;22(1):1–10.
43. Golovaty I, Sharma M, Van Heerden A, Van Rooyen H, Baeten JM, Celum C. Cost of integrating non-communicable disease screening into home-based HIV testing and counseling in South Africa. *J Acquir Immune Defic Syndr*. 2018;78(5):522.
44. Contreras CC, Millones AK, Santa Cruz J, Aguilar M, Clendenes M, Toranzo M. Addressing tuberculosis patients' medical and socio-economic needs: a comprehensive programmatic approach. *Trop Med Int Health*. 2017;22(4):505–11.

45. Zayar NN, Chotipanvithayakul R, Htet KKK, Chongsuvivatwong V. Programmatic cost-effectiveness of a second-time visit to detect new tuberculosis and diabetes mellitus in TB contact tracing in Myanmar. *Int J Environ Res Public Health*. 2022;19(23).
46. Harasemiw O, Ferguson T, Lavallee B, McLeod L, Chartrand C, Rigatto C. Impact of point-of-care screening for hypertension, diabetes and progression of chronic kidney disease in rural Manitoba Indigenous communities. *CMAJ*. 2021;193(28):E1076-84.
47. Ji Y, Cao H, Liu Q, Li Z, Song H, Xu D, et al. Screening for pulmonary tuberculosis in high-risk groups of diabetic patients. *Int J Infect Dis*. 2020;93:84–9.
48. Vedanthan R, Kamano JH, Chrysanthopoulou SA, Mugo R, Andama B, Bloomfield GS, et al. Group medical visit and microfinance intervention for patients with diabetes or hypertension in Kenya. *J Am Coll Cardiol*. 2021;77(16):2007–18.
49. Moor SE, Tusubira AK, Wood D, Akiteng AR, Galusha D, Tessier-Sherman B, et al. Patient preferences for facility-based management of hypertension and diabetes in rural Uganda: a discrete choice experiment. *BMJ Open*. 2022;12(7):e059949. <https://doi.org/10.1136/bmjopen-2021-059949> PMID: [35863829](https://pubmed.ncbi.nlm.nih.gov/35863829/)
50. Sando D, Kintu A, Okello S, Kawungezi PC, Guwatudde D, Mutungi G, et al. Cost-effectiveness analysis of integrating screening and treatment of selected non-communicable diseases into HIV/AIDS treatment in Uganda. *J Intern AIDS Soc*. 2020;23(S1). <https://doi.org/10.1002/jia2.25507>
51. Kasaie P, Weir B, Schnure M, Dun C, Pennington J, Teng Y, et al. Integrated screening and treatment services for HIV, hypertension and diabetes in Kenya: assessing the epidemiological impact and cost-effectiveness from a national and regional perspective. *J Int AIDS Soc*. 2020;23(Suppl 1):e25499.
52. Li L, Lin Y, Mi F, Tan S, Liang B, Guo C. Screening of patients with tuberculosis for diabetes mellitus in China. *Trop Med Int Health*. 2012;17(10):1294–301.
53. Basir MS, Habib SS, Zaidi SMA, Khowaja S, Hussain H, Ferrand RA. Operationalization of bi-directional screening for tuberculosis and diabetes in private sector healthcare clinics in Karachi, Pakistan. *BMC Health Serv Res*. 2019;19(1).
54. Jerenea D, Hiruy N, Jemal I, Gebrekiros W, Anteneh T, Habte D, et al. The yield and feasibility of integrated screening for TB, diabetes and HIV in four public hospitals in Ethiopia. *Int Health*. 2017;9(2):100–4.
55. Kachimanga C, Cundale K, Wroe E, Nazimera L, Jumbe A, Dunbar E, et al. Novel approaches to screening for noncommunicable diseases: Lessons from Neno, Malawi. *Malawi Med J*. 2017;29(2):78–83. <https://doi.org/10.4314/mmj.v29i2.1> PMID: [28955411](https://pubmed.ncbi.nlm.nih.gov/28955411/)
56. Patel SA, Sharma H, Mohan S, Weber MB, Jindal D, Jarhyan P, et al. The Integrated Tracking, Referral, and Electronic Decision Support, and Care Coordination (I-TREC) program: scalable strategies for the management of hypertension and diabetes within the government healthcare system of India. *BMC Health Serv Res*. 2020;20(1):1022. <https://doi.org/10.1186/s12913-020-05851-w> PMID: [33168004](https://pubmed.ncbi.nlm.nih.gov/33168004/)
57. Zou G, Witter S, Caperon L, Walley J, Cheedella K, Senesi RGB, et al. Adapting and implementing training, guidelines and treatment cards to improve primary care-based hypertension and diabetes management in a fragile context: results of a feasibility study in Sierra Leone. *BMC Public Health*. 2020;20(1):1185. <https://doi.org/10.1186/s12889-020-09263-7> PMID: [32727423](https://pubmed.ncbi.nlm.nih.gov/32727423/)
58. Rachlis B, Naanyu V, Wachira J, Genberg B, Koech B, Kamene R, et al. Identifying common barriers and facilitators to linkage and retention in chronic disease care in western Kenya. *BMC Public Health*. 2016;16:741. <https://doi.org/10.1186/s12889-016-3462-6> PMID: [27503191](https://pubmed.ncbi.nlm.nih.gov/27503191/)
59. Mulugeta TK, Kassa DH. Readiness of the primary health care units and associated factors for the management of hypertension and type II diabetes mellitus in Sidama, Ethiopia. *PeerJ*. 2022.
60. Tusubira AK, Nalwadda CK, Akiteng AR, Hsieh E, Ngaruiya C, Rabin TL. Social support for self-care: patient strategies for managing diabetes and hypertension in rural Uganda. *Ann Glob Health*. 2021;87(1):1–13.
61. Birungi J, Kivuyo S, Garrib A, Mugenyi L, Mutungi G, Namakoola I, et al. Integrating health services for HIV infection, diabetes and hypertension in sub-Saharan Africa: a cohort study. *BMJ Open*. 2021;11(11).
62. Wang Z, An J, Lin H, Zhou J, Liu F, Chen J. Pathway-driven coordinated telehealth system for management of patients with single or multiple chronic diseases in China: System development and retrospective study. *JMIR Med Inform*. 2021;9(5).
63. Correia JC, Lachat S, Lagger G, Chappuis F, Golay A, Beran D, et al. Interventions targeting hypertension and diabetes mellitus at community and primary healthcare level in low- and middle-income countries: a scoping review. *BMC Public Health*. 2019;19(1):1542. <https://doi.org/10.1186/s12889-019-7842-6> PMID: [31752801](https://pubmed.ncbi.nlm.nih.gov/31752801/)
64. Yoon S, Goh H, Phang JK, Kwan YH, Low LL. Socioeconomic and behavioral determinants of non-compliance with physician referrals following community screening for diabetes, hypertension and hyperlipidemia: a mixed-methods study. *Sci Rep*. 2023;13(1).
65. Nyirenda JLZ, Bockey A, Wagner D, Lange B. Effect of Tuberculosis (TB) and Diabetes mellitus (DM) integrated healthcare on bidirectional screening and treatment outcomes among TB patients and people living with DM in developing countries: a systematic review. *Pathog Glob Health*. 2023;117(1):36–51. <https://doi.org/10.1080/20477724.2022.2046967> PMID: [35296216](https://pubmed.ncbi.nlm.nih.gov/35296216/)
66. Petersen EM, Wroe EB, Nyangulu K, Kanyenda C, Njolomole S, Dunbar EL. Integrated home-based screening for people living with disabilities: A case study from rural Malawi. *Afr J Disabil*. 2019.
67. Smith PJ, Davey DJ, Green H, Cornell M, Bekker LG. Reaching underserved South Africans with integrated chronic disease screening and mobile HIV counselling and testing: A retrospective, longitudinal study conducted in Cape Town. *PLoS One*. 2021;16(5):e0249600.
68. Kayali M, Moussally K, Lakis C, Abrash MA, Sawan C, Reid A, et al. Treating Syrian refugees with diabetes and hypertension in Shatila refugee camp, Lebanon: Médecins Sans Frontières model of care and treatment outcomes. *Confl Health*. 2019;13:12. <https://doi.org/10.1186/s13031-019-0191-3> PMID: [30976298](https://pubmed.ncbi.nlm.nih.gov/30976298/)

69. Flood D, Edwards EW, Giovannini D, Ridley E, Rosende A, Herman WH. Integrating hypertension and diabetes management in primary health care settings: HEARTS as a tool. *Revista Panamericana de Salud Pública*. 2022;46:e150.
70. Hoy WE, Davey RL, Sharma S, Hoy PW, Smith JM, Kondalsamy-Chennakesavan S. Chronic disease profiles in remote Aboriginal settings and implications for health services planning. *Aust N Z J Public Health*. 2010;34(1):11–8.
71. Miselli MA, Cavallin F, Marwa S, Ndunguru B, Itambu RJ, Mutalemwa K. An integrated management system for noncommunicable diseases program implementation in a sub-saharan setting. *Int J Environ Res Public Health*. 2021;18(21):11619.
72. Huque R, Nasreen S, Ahmed F, Hicks JP, Walley J, Newell JN, et al. Integrating a diabetes and hypertension case management package within primary health care: a mixed methods feasibility study in Bangladesh. *BMC Health Serv Res*. 2018;18(1):811. <https://doi.org/10.1186/s12913-018-3601-0> PMID: 30352582
73. Pastakia SD, Manyara SM, Vedanthan R, Kamano JH, Menya D, Andama B, et al. Impact of Bridging Income Generation with Group Integrated Care (BIGPIC) on Hypertension and Diabetes in Rural Western Kenya. *J Gen Intern Med*. 2017;32(5):540–8.
74. Provost S, Pineault R, Grimard D, Pérez J, Fournier M, Lévesque Y. Implementation of an integrated primary care cardiometabolic risk prevention and management network in Montréal: does greater coordination of care with primary care physicians have an impact on health outcomes?. *Health Promot Chronic Dis Prev Can*. 2017;37(4):105.
75. Jayanna K, Swaroop N, Kar A, Ramanaik S, Pati MK, Pujar A. Designing a comprehensive non-communicable diseases (NCD) programme for hypertension and diabetes at primary health care level: Evidence and experience from urban Karnataka, South India. *BMC Public Health*. 2019;19(1):1–12.
76. CARRS Trial Writing Group, Shah S, Singh K, Ali MK, Mohan V, Kadir MM, et al. Improving diabetes care: multi-component cardiovascular disease risk reduction strategies for people with diabetes in South Asia--the CARRS multi-center translation trial. *Diabetes Res Clin Pract*. 2012;98(2):285–94. <https://doi.org/10.1016/j.diabres.2012.09.023> PMID: 23084280
77. Soleimani N, Ebrahimi F, Mirzaei M. Self-management education for hypertension, diabetes, and dyslipidemia as major risk factors for cardiovascular disease: insights from stakeholders' experiences and expectations. *PLoS One*. 2024;19(9).
78. Price-Haywood EG, Amering S, Luo Q, Lefante JJ. Clinical Pharmacist Team-Based Care in a Safety Net Medical Home: Facilitators and Barriers to Chronic Care Management. *Popul Health Manag*. 2017;20(2):123–31. <https://doi.org/10.1089/pop.2015.0177> PMID: 27124294
79. Ariffin F, Safura Ramli A, Hannah Daud M, Haniff J, Abdul-Razak S, Selvarajah S. Feasibility of Implementing Chronic Care Model in the Malaysian Public Primary Care Setting.
80. Saleh S, Farah A, Dimassi H, El Arnaout N, Constantin J, Osman M. Using mobile health to enhance outcomes of noncommunicable diseases care in rural settings and refugee camps: randomized controlled trial. *JMIR Mhealth Uhealth*. 2018;6(7).
81. Mpagama SG, Byashalira KC, Chamba NG, Heysell SK, Alimohamed MZ, Shayo PJ, et al. Implementing innovative approaches to improve health care delivery systems for integrating communicable and non-communicable diseases using tuberculosis and diabetes as a model in Tanzania. *Int J Environ Res Public Health*. 2023;20(17).
82. Gnanasan S, Ting KN, Wong KT, Mohd Ali S, Muttalif AR, Anderson C. Convergence of tuberculosis and diabetes mellitus: time to individualise pharmaceutical care. *Int J Clin Pharm*. 2011;33(1):44–52. <https://doi.org/10.1007/s11096-010-9452-3> PMID: 21365392
83. Mohd ZW, Ahmad SR, Yaacob NA, Mohd Shariff N, Jaeb MZ, Hussin Z. Innovative Integrated Motivational Interviewing for Dual Management in Tuberculosis Patients with Diabetes (MID-DOT) in Malaysia. *Healthcare*. 2023;11(13).
84. Frieden M, Zamba B, Mukumbi N, Mafaune PT, Makumbe B, Irungu E, et al. Setting up a nurse-led model of care for management of hypertension and diabetes mellitus in a high HIV prevalence context in rural Zimbabwe: a descriptive study. *BMC Health Serv Res*. 2020;20(1):486. <https://doi.org/10.1186/s12913-020-05351-x> PMID: 32487095
85. Some D, Edwards JK, Reid T, Van Den Bergh R, Kosgei RJ, Wilkinson E. Task shifting the management of non-communicable diseases to nurses in Kibera, Kenya: does it work?. *PLoS One*. 2016;11(1).
86. Labhardt ND, Balo JR, Ndam M, Grimm JJ, Manga E. Task shifting to non-physician clinicians for integrated management of hypertension and diabetes in rural Cameroon: A programme assessment at two years. *BMC Health Serv Res*. 2010;10(1):1–10.
87. de Macedo VLM, de Sousa NP, Dos Santos ACD, Santos W, Stival MM, Rehem TCMSB. Coordination of care in health systems for users with diabetes and hypertension: a scoping review. *Rev Lat Am Enfermagem*. 2025;33:e4428.
88. Mohr DC, Benzer JK, Vimalananda VG, Singer SJ, Meterko M, McIntosh N. Organizational Coordination and Patient Experiences of Specialty Care Integration. *J Gen Intern Med*. 2019;34(Suppl 1):30–6.
89. Benzer JK, Singer SJ, Mohr DC, McIntosh N, Meterko M, Vimalananda VG, et al. Survey of patient-centered coordination of care for diabetes with cardiovascular and mental health comorbidities in the Department of Veterans Affairs. *J Gen Intern Med*. 2019;34(Suppl 1):43–9.
90. Tusubira AK, Ssinabulya I, Kalyesubula R, Nalwadda CK, Akiteng AR, Ngaruiya C, et al. Self-care and healthcare seeking practices among patients with hypertension and diabetes in rural Uganda. *PLOS Glob Public Health*. 2023;3(12):e0001777. <https://doi.org/10.1371/journal.pgph.0001777> PMID: 38079386
91. Katz IJ, Pirabhahar S, Williamson P, Raghunath V, Brennan F, O'Sullivan A, et al. iConnect CKD - virtual medical consulting: A web-based chronic kidney disease, hypertension and diabetes integrated care program. *Nephrology (Carlton)*. 2018;23(7):646–52. <https://doi.org/10.1111/nep.13070> PMID: 28474361

92. Deo S, Singh P. Community health worker-led, technology-enabled private sector intervention for diabetes and hypertension management among urban poor: a retrospective cohort study from large Indian metropolitan city. *BMJ Open*. 2021;11(8):e045246.
93. Jindal D, Gupta P, Jha D, Ajay VS, Goenka S, Jacob P, et al. Development of mWellcare: an mHealth intervention for integrated management of hypertension and diabetes in low-resource settings. *Glob Health Action*. 2018;11(1):1517930. <https://doi.org/10.1080/16549716.2018.1517930> PMID: [30253691](https://pubmed.ncbi.nlm.nih.gov/30253691/)
94. Oh SW, Kim KK, Kim SS, Park SK, Park S. Effect of an integrative mobile health intervention in patients with hypertension and diabetes: cross-over study. *JMIR Mhealth Uhealth*. 2022;10(1).
95. Marquard JL, Garber L, Saver B, Amster B, Kelleher M, Preusse P. Overcoming challenges integrating patient-generated data into the clinical EHR: lessons from the CONtrolling Disease Using Inexpensive IT--Hypertension in Diabetes (CONDUIT-HID) Project. *Int J Med Inform*. 2013;82(10):903–10. <https://doi.org/10.1016/j.ijmedinf.2013.04.009> PMID: [23800678](https://pubmed.ncbi.nlm.nih.gov/23800678/)
96. Murudi-Manganye NS, Makhado L, Sehularo LA. An Integrated Reporting Tool for Management of Hiv And Non-communicable Diseases for Primary Health Care Facilities in Limpopo Province, South Africa. *TOPHJ*. 2022;15(1). <https://doi.org/10.2174/18749445-v15-e2208180>
97. Oyugi B, Makunja S, Kabuti W, Nyongesa C, Schömburg M, Kibe V. Improving the management of hypertension and diabetes: An implementation evaluation of an electronic medical record system in Nairobi County, Kenya. *Int J Med Inform*. 2020;141.
98. Abughosh S, Wang X, Serna O, Esse T, Mann A, Masilamani S, et al. A Motivational Interviewing Intervention by Pharmacy Students to Improve Medication Adherence. *J Manag Care Spec Pharm*. 2017;23(5):549–60. <https://doi.org/10.18553/jmcp.2017.23.5.549> PMID: [28448784](https://pubmed.ncbi.nlm.nih.gov/28448784/)
99. Ross LA, Bloodworth LS, Brown MA, Malinowski SS, Crane R, Sutton V. The Mississippi Delta Health Collaborative Medication Therapy Management Model: Public Health and Pharmacy Working Together to Improve Population Health in the Mississippi Delta. *Prev Chronic Dis*. 2020;17.
100. Wong K, Boulanger L, Smalarz A, Wu N, Fraser K, Wogen J. Impact of care management processes and integration of care on blood pressure control in diabetes. *BMC Fam Pract*. 2013.
101. Amon S, Aikins M, Haghparast-Bidgoli H, Kretchy IA, Arhinful DK, Baatiema L, et al. Household economic burden of type-2 diabetes and hypertension comorbidity care in urban-poor Ghana: a mixed methods study. *BMC Health Serv Res*. 2024;24(1):1028. <https://doi.org/10.1186/s12913-024-11516-9> PMID: [39232716](https://pubmed.ncbi.nlm.nih.gov/39232716/)
102. Hoy WE, Kondalsamy-Chennakesavan S, Scheppingen J, Sharma S, Katz I. A chronic disease outreach program for Aboriginal communities. *Kidney Int Suppl*. 2005;68(98).
103. Oliveira Hashiguchi L, Cox SE, Edwards T, Castro MC, Khan M, Liverani M. How can tuberculosis services better support patients with a diabetes co-morbidity? A mixed methods study in the Philippines. *BMC Health Serv Res*. 2023;23(1):1027. <https://doi.org/10.1186/s12913-023-10015-7> PMID: [37749519](https://pubmed.ncbi.nlm.nih.gov/37749519/)
104. Nyirenda JL, Mbemba E, Chirwa M, Mbakaya B, Ngwira B, Wagner D, et al. Acceptability and feasibility of tuberculosis and diabetes mellitus bidirectional screening and joint treatment services in Malawi: a cross-sectional study and a policy document review. *BMJ Open*. 2023;13(1):e062009. <https://doi.org/10.1136/bmjopen-2022-062009> PMID: [36609325](https://pubmed.ncbi.nlm.nih.gov/36609325/)
105. Workneh MH, Bjune GA, Yimer SA. Assessment of health system challenges and opportunities for possible integration of diabetes mellitus and tuberculosis services in South-Eastern Amhara Region, Ethiopia: a qualitative study. *BMC Health Serv Res*. 2016;16:135. <https://doi.org/10.1186/s12913-016-1378-6> PMID: [27095028](https://pubmed.ncbi.nlm.nih.gov/27095028/)
106. Salifu RS, Hlongwana KW. Exploring the mechanisms of collaboration between the tuberculosis and diabetes programs for the control of TB-DM comorbidity in Ghana. *BMC Res Notes*. 2021;14(1):1–6.
107. Arini M, Sugiyono D, Permana I. Challenges, opportunities, and potential roles of the private primary care providers in tuberculosis and diabetes mellitus collaborative care and control: a qualitative study. *BMC Health Serv Res*. 2022;22(1):215. <https://doi.org/10.1186/s12913-022-07612-3> PMID: [35177037](https://pubmed.ncbi.nlm.nih.gov/35177037/)
108. Salifu RS, Hlongwana KW. Barriers and facilitators to bidirectional screening of TB-DM in Ghana: healthcare workers' perspectives. *PLoS One*. 2020;15(7):e0235914.
109. Williams V, Vos-Seda AG, Haumba S, Mduli-Dlamini L, Calnan M, Grobbee DE. Diabetes-Tuberculosis Care in Eswatini: A Qualitative Study of Opportunities and Recommendations for Effective Services Integration. *International Journal of Public Health*. 2023.
110. Badacho AS, Mahomed OH. Sustainability of integrated hypertension and diabetes with HIV care for people living with HIV at primary health care in South Ethiopia: implication for integration. *BMC Prim Care*. 2023;24(1):244. <https://doi.org/10.1186/s12875-023-02204-4> PMID: [37978442](https://pubmed.ncbi.nlm.nih.gov/37978442/)
111. Owusu R, Bawua SA, Kwarteng EB, Baatiema L, Nonvignon J. A qualitative exploration of policy interventions to improve the health-related quality of life of people living with HIV/AIDS and co-morbidities of hypertension and/or diabetes in Ghana. *PLoS One*. 2024;19(10):e0311994. <https://doi.org/10.1371/journal.pone.0311994> PMID: [39392845](https://pubmed.ncbi.nlm.nih.gov/39392845/)
112. Ruslami R, Koesoemadinata RC, Soetedjo NNM, Imaculata S, Gunawan Y, Permana H, et al. The effect of a structured clinical algorithm on glycemic control in patients with combined tuberculosis and diabetes in Indonesia: A randomized trial. *Diabetes Res Clin Pract*. 2021;173:108701. <https://doi.org/10.1016/j.diabres.2021.108701> PMID: [33609618](https://pubmed.ncbi.nlm.nih.gov/33609618/)
113. Prakoso DA, Istiono W, Mahendradhata Y, Arini M. Acceptability and feasibility of tuberculosis-diabetes mellitus screening implementation in private primary care clinics in Yogyakarta, Indonesia: a qualitative study. *BMC Public Health*. 2023;23(1):1908. <https://doi.org/10.1186/s12889-023-16840-z> PMID: [37789310](https://pubmed.ncbi.nlm.nih.gov/37789310/)

114. Buffardi AL. Sector-wide or disease-specific? Implications of trends in development assistance for health for the SDG era. *Health Policy Plan.* 2018;33(3):381–91. <https://doi.org/10.1093/heapol/czx181> PMID: 29351607
115. Xie W, Paul RR, Goon IY, Anan A, Rahim A, Hossain MM. Enhancing care quality and accessibility through digital technology-supported decentralisation of hypertension and diabetes management: a proof-of-concept study in rural Bangladesh. *BMJ Open.* 2023;13(11).
116. Wroe EB, Kalanga N, Dunbar EL, Nazimera L, Price NF, Shah A. Expanding access to non-communicable disease care in rural Malawi: outcomes from a retrospective cohort in an integrated NCD–HIV model. *BMJ Open.* 2020;10(10):e036836.
117. Jeon CY, Murray MB, Baker MA. Managing tuberculosis in patients with diabetes mellitus: why we care and what we know. *Expert Rev Anti Infect Ther.* 2012;10(8):863–8. <https://doi.org/10.1586/eri.12.75> PMID: 23030325
118. Bukenya D, Van Hout M-C, Shayo EH, Kitabye I, Junior BM, Kasidi JR, et al. Integrated healthcare services for HIV, diabetes mellitus and hypertension in selected health facilities in Kampala and Wakiso districts, Uganda: A qualitative methods study. *PLOS Glob Public Health.* 2022;2(2):e0000084. <https://doi.org/10.1371/journal.pgph.0000084> PMID: 36962287
119. Johnson M, Jastrzab R, Tate J, Johnson K, Hall-Lipsy E, Martin R, et al. Evaluation of an Academic-Community Partnership to Implement MTM Services in Rural Communities to Improve Pharmaceutical Care for Patients with Diabetes and/or Hypertension. *J Manag Care Spec Pharm.* 2018;24(2):132–41. <https://doi.org/10.18553/jmcp.2018.24.2.132> PMID: 29384026
120. Harvey IS, Schulz AJ, Israel BA, Sand S, Myrie D, Lockett MP, et al. The Healthy Connections project: a community-based participatory research project involving women at risk for diabetes and hypertension. *Prog Community Health Partnersh.* 2009;3(4):273–4. <https://doi.org/10.1353/cpr.0.0089> PMID: 20097987
121. Lopez JZ, Lee MJ, Park SK, Zolezzi ME, Mitchell-Bennett LA, Yeh PG. An expanded chronic care management approach to multiple chronic conditions in Hispanics using community health workers as community extenders in the Rio Grande Valley of Texas. *Prev Med.* 2024.
122. Kementerian Kesehatan R. Konsensus pengelolaan tuberkulosis dan diabetes mellitus (TB-DM) di Indonesia. 2015. <https://pbperkeni.or.id/wp-content/uploads/2022/07/Konsensus-Nasional-TB-DM.pdf>
123. Lin A, Harries AMV, Kumar JA, Critchley R van, Crevel PO, Dlodlo RA, et al. Management of diabetes mellitus-tuberculosis.
124. World Health Organization. Integrated care for tuberculosis (TB) and diabetes mellitus (DM) comorbidity in Asian countries: health system challenges and opportunities. <https://www.who.int/publications/i/item/9789290209508>
125. Guidelines on Integrating Existing Protocols on Tuberculosis (TB) and Diabetes Mellitus (DM) Case Finding and Management Activities. National TB Control Program. 2023. <https://ntp.doh.gov.ph/download/ao2020-0026/>
126. Nyabereka R. DSD guidance for integration of HTN and DM for people living with HIV. 2022.
127. Integrated care for tuberculosis (TB) and diabetes mellitus (DM) comorbidity in Asian countries: health system challenges and opportunities. <https://www.who.int/publications/i/item/9789290209508>
128. USAID. Ethiopia Technical Brief Integrating Service Delivery for TB and Diabetes Mellitus-An Innovative and Scalable Approach in Ethiopia. 2017.
129. World Health Organization. Tuberculosis and diabetes: invest for impact INFORMATION NOTE. 2023. <https://www.who.int/teams/global-tuber->
130. Integrated tuberculosis and diabetes mellitus care, Uganda/Zimbabwe. <https://www.worlddiabetesfoundation.org/what-we-do/projects/wdf15-1211/>
131. Improving diabetes and hypertension diagnosis in TB patients, Angola. <https://www.worlddiabetesfoundation.org/what-we-do/projects/wdf14-0873/>
132. Bank Health W. Hypertension and type-2 diabetes in Bangladesh.
133. Revised National Tuberculosis Control Programme (RNTCP), National Programme for Prevention and Control of Cancer, Diabetes, Cardiovascular Diseases and Stroke (NPCDCS). National framework for joint TB-Diabetes collaborative activities.
134. Ministry of Health & Family Welfare. Operational Guidelines for TB Services at Ayushman Bharat Health and Wellness Centres. India. 2020.
135. Majumdar A, Wilkinson E, Rinu PK, Maung TM, Bachani D, Punia JS. Tuberculosis-diabetes screening: how well are we doing? A mixed-methods study from North India. *Public Health Action.* 2019;9(1):3–10.
136. Etxeberria A, Alcorta I, Pérez I, Emparanza JI, Ruiz De Velasco E, Iglesias MT, et al. Results from the CLUES study: A cluster randomized trial for the evaluation of cardiovascular guideline implementation in primary care in Spain. *BMC Health Serv Res.* 2018;18(1):1–10.
137. Tu Q, Xiao LD, Ullah S, Fuller J, Du H. A transitional care intervention for hypertension control for older people with diabetes: A cluster randomized controlled trial. *J Adv Nurs.* 2020;76(10):2696–708.
138. Istepanian RSH, Sungoor A, Earle KA. Technical and compliance considerations for mobile health self-monitoring of glucose and blood pressure for patients with diabetes. *Annu Int Conf IEEE Eng Med Biol Soc.* 2009;2009:5130–3. <https://doi.org/10.1109/IEMBS.2009.5334580> PMID: 19965037
139. Rutayisire R, Mutabazi F, Bayingana A, Miller AC, Gupta N, Ngoga G, et al. Integration of Chronic Oncology Services in Noncommunicable Disease Clinic in Rural Rwanda. *Ann Glob Health.* 2020;86(1):33. <https://doi.org/10.5334/aogh.2697> PMID: 32257833
140. McAtee CM, Baker JT, DeWolf BM, Sheridan MN, George EM, Sutton NA. Evaluation of a Cardiovascular Disease/Diabetes Mellitus Expansion Program for Community Health Workers Employed by Rhode Island Community Health Teams. *J Public Health Manag Pract.* 2024;30:S18–26. <https://doi.org/10.1097/PHH.0000000000001896> PMID: 38870356

141. Khetan A, Zullo M, Rani A, Gupta R, Purushothaman R, Bajaj NS, et al. Effect of a Community Health Worker-Based Approach to Integrated Cardiovascular Risk Factor Control in India: A Cluster Randomized Controlled Trial. *Glob Heart*. 2019;14(4):355–65. <https://doi.org/10.1016/j.gheart.2019.08.003> PMID: 31523014
142. Agarwal G, Gaber J, Richardson J, Mangin D, Ploeg J, Valaitis R, et al. Pilot randomized controlled trial of a complex intervention for diabetes self-management supported by volunteers, technology, and interprofessional primary health care teams. *Pilot Feasibility Stud*. 2019;5:118. <https://doi.org/10.1186/s40814-019-0504-8> PMID: 31673398
143. Coe AB, Choe HM, Diez HL, Rockey NG, Ashjian EJ, Dorsch MP, et al. Pharmacists providing care in statewide physician organizations: findings from the Michigan Pharmacists Transforming Care and Quality Collaborative. *J Manag Care Spec Pharm*. 2020;26(12):1558–66.
144. Brunisholz KD, Olson J, Anderson JW, Hays E, Tilbury PM, Winter B, et al. “Pharming out” support: a promising approach to integrating clinical pharmacists into established primary care medical home practices. *J Int Med Res*. 2018;46(1):234–48. <https://doi.org/10.1177/0300060517710885> PMID: 28789606
145. Belizan M, Alonso JP, Nejamis A, Caporale J, Copo MG, Sánchez M, et al. Barriers to hypertension and diabetes management in primary health care in Argentina: qualitative research based on a behavioral economics approach. *Transl Behav Med*. 2020;10(3):741–50. <https://doi.org/10.1093/tbm/ibz040> PMID: 30947329
146. Workneh MH, Bjune GA, Yimer SA. Diabetes mellitus is associated with increased mortality during tuberculosis treatment: a prospective cohort study among tuberculosis patients in South-Eastern Amahra Region, Ethiopia. *Infect Dis Poverty*. 2016;5(1):1–10.
147. Kumar A, Gupta D, Nagaraja SB, Nair A, Satyanarayana S, Kumar AMV. Screening of patients with diabetes mellitus for tuberculosis in India. *Trop Med Int Health*. 2013;18(5):646–54.
148. Xiao W, Huang D, Li S, Zhou S, Wei X, Chen B, et al. Delayed diagnosis of tuberculosis in patients with diabetes mellitus co-morbidity and its associated factors in Zhejiang Province, China. *BMC Infect Dis*. 2021;21(1):272. <https://doi.org/10.1186/s12879-021-05929-8> PMID: 33736610
149. Naik B, Kumar AMV, Satyanarayana S, Suryakant MD, Swamy NMV, Nair S, et al. Is screening for diabetes among tuberculosis patients feasible at the field level?. *Public Health Action*. 2013;3(Suppl 1):S34.
150. Shi X, He J, Lin M, Liu C, Yan B, Song H, et al. Comparative effectiveness of team-based care with a clinical decision support system versus team-based care alone on cardiovascular risk reduction among patients with diabetes: Rationale and design of the D4C trial. *Am Heart J*. 2021;238:45–58. <https://doi.org/10.1016/j.ahj.2021.04.009> PMID: 33957103
151. Roll A, Pattison D, Baumgartner R, Sublett L, Brown B. The design and evaluation of a pilot covisit model: Integration of a pharmacist into a primary care team. *J Am Pharm Assoc (2003)*. 2020;60(3):491–6. <https://doi.org/10.1016/j.japh.2019.11.017> PMID: 31889652
152. Nyirenda JLZ, Wagner D, Ngwira B, Lange B. Bidirectional screening and treatment outcomes of diabetes mellitus (DM) and tuberculosis (TB) patients in hospitals with measures to integrate care of DM and TB and those without integration measures in Malawi. *BMC Infectious Diseases*. 2022;22(1).
153. Hu PL, Tan CY-L, Nguyen NHL, Wu RR, Bahadin J, Nadkarni NV, et al. Integrated care teams in primary care improve clinical outcomes and care processes in patients with non-communicable diseases. *Singapore Med J*. 2023;64(7):423–9. <https://doi.org/10.11622/smedj.2022067> PMID: 35706106
154. Katundu KGH, Mukhula V, Matemvu Z, Mtonga AJ, Kasanda-Ndambo M, Lubanga AF. Barriers and facilitators to integration of screening for hypertension, diabetes mellitus and dyslipidaemia, among adult people living with HIV at district hospital ART clinics in Southern Malawi. *Res Sq*. 2024.
155. Shayo EH, Kivuyo S, Seeley J, Bukenya D, Karoli P, Mfinanga SG, et al. The acceptability of integrated healthcare services for HIV and non-communicable diseases: experiences from patients and healthcare workers in Tanzania. *BMC Health Serv Res*. 2022;22(1):655. <https://doi.org/10.1186/s12913-022-08065-4> PMID: 35578274
156. Katz I, Schneider H, Shezi Z, Mdeleleni G, Gerntholtz T, Butler O, et al. Managing type 2 diabetes in Soweto-The South African Chronic Disease Outreach Program experience. *Prim Care Diabetes*. 2009;3(3):157–64. <https://doi.org/10.1016/j.pcd.2009.06.007> PMID: 19640820
157. Hotu C, Bagg W, Collins J, Harwood L, Whalley G, Doughty R, et al. A community-based model of care improves blood pressure control and delays progression of proteinuria, left ventricular hypertrophy and diastolic dysfunction in Maori and Pacific patients with type 2 diabetes and chronic kidney disease: a randomized controlled trial. *Nephrol Dial Transplant*. 2010;25(10):3260–6.
158. Stojnić N, Klemenc-Ketiš Z, Mori Lukančič M, Zavrnik Č, Poplas Susič A. Perceptions of the primary health care team about the implementation of integrated care of patients with type 2 diabetes and hypertension in Slovenia: qualitative study. *BMC Health Serv Res*. 2023;23(1):362. <https://doi.org/10.1186/s12913-023-09353-3> PMID: 37046293
159. Alzubaidi HT, Chandir S, Hasan S, McNamara K, Cox R, Krass I. Diabetes and cardiovascular disease risk screening model in community pharmacies in a developing primary healthcare system: a feasibility study. *BMJ Open*. 2019;9(11):e031246. <https://doi.org/10.1136/bmjopen-2019-031246> PMID: 31712336
160. Raghuvveer P, Anand T, Tripathy JP, Nirgude AS, Reddy MM, Nandy S, et al. Opportunistic screening for diabetes mellitus and hypertension in primary care settings in Karnataka, India: a few steps forward but still some way to go. *F1000Res*. 2020;9:335. <https://doi.org/10.12688/f1000research.22825.1> PMID: 33299546

161. Pence BW, Gaynes BN, Udedi M, Kulisewa K, Zimba CC, Akiba CF, et al. Two implementation strategies to support the integration of depression screening and treatment into hypertension and diabetes care in Malawi (SHARP): parallel, cluster-randomised, controlled, implementation trial. *Lancet Glob Health*. 2024;12(4):e652–61. [https://doi.org/10.1016/S2214-109X\(23\)00592-2](https://doi.org/10.1016/S2214-109X(23)00592-2) PMID: 38408462
162. Muwanguzi M, Obua C, Maling S, Wong W, Owokuhaisa J, Wakida EK. Barriers and facilitators to cognitive impairment screening among older adults with diabetes mellitus and hypertension by primary healthcare providers in rural Uganda. *Front Health Serv*. 2023;3:1172943. <https://doi.org/10.3389/frhs.2023.1172943> PMID: 37323226
163. Jia G, Sowers JR. Hypertension in diabetes: an update of basic mechanisms and clinical disease. *Hypertension*. 2021;78(5):1197–205.
164. Wang N, Wu L, Liu Z, Liu J, Liu X, Feng Y, et al. Influence of tuberculosis knowledge on acceptance of preventive treatment and the moderating role of tuberculosis stigma among China's general population: cross-sectional analysis. *BMC Public Health*. 2024;24(1):2300. <https://doi.org/10.1186/s12889-024-19812-z> PMID: 39180047
165. World Health Organization. Guidelines for the management of hypertension in patients with diabetes mellitus Quick reference guide.
166. Passarella P, Kiseleva TA, Valeeva FV, Gosmanov AR. Hypertension management in diabetes: 2018 update. *Diabetes Spectrum*. 2018;31(3):218–24.
167. TB and diabetes. <https://www.who.int/publications/digital/global-tuberculosis-report-2021/featured-topics/tb-diabetes>
168. Ansbro É, Issa R, Willis R, Blanchet K, Perel P, Roberts B. Chronic NCD care in crises: A qualitative study of global experts' perspectives on models of care for hypertension and diabetes in humanitarian settings. *J Migr Health*. 2022.
169. World Health Organization. WHO Global Strategy on Integrated People-Centered Health Services 2016–2026 Executive Summary. 2015. <https://interprofessional.global/wp-content/uploads/2019/11/WHO-2015-Global-strategy-on-integrated-people-centred-health-services-2016-2026.pdf>
170. De Foo C, Shrestha P, Wang L, Du Q, García Basteiro AL, Abdullah AS. Integrating tuberculosis and noncommunicable diseases care in low- and middle-income countries (LMICs): A systematic review. *PLoS Med*. 2022;19(1):e1003899.
171. Jayasinghe S. People-centred care: a systems view of a new paradigm. *Discov Health Systems*. 2025;4(1). <https://doi.org/10.1007/s44250-025-00215-9>
172. OECD. Towards an Integrated Health Information System in the Netherlands. 2022. [https://www.oecd.org/en/publications/towards-an-integrated-health-information-system-in-the-netherlands\\_a1568975-en.html](https://www.oecd.org/en/publications/towards-an-integrated-health-information-system-in-the-netherlands_a1568975-en.html)
173. Boubacar A. Healthcare Financing in Low and Middle-Income Countries and Achieving Universal Health Coverage. *Resolusi: Jurnal Sosial Politik*. 2021;4(2):86–94.
